# Supplementary material for: Disrupted PGR-B and ESR1 signaling underlies defective decidualization linked to severe preeclampsia
Source: eLife. 2021 Oct 28;10:e70753. doi: 10.7554/eLife.70753 (PMC8553341; doi:10.7554/eLife.70753)
Supplement: Figure 2—source data 1. [file elife-70753-fig2-data1.xlsx]

## Sheet: FC1.2
Figure 2 - Source data 1. The 593 statistically differential expressed genes (FDR < 0.05) with at least 1.2-fold change (FC ≥ 1.2) in sPE vs control cases obtained from RNA-seq analysis.
Gene Symbol	PValue	FDR	logFC	FC*
MMP3	8.66751e-05	0.0132689	-6.11672	-69.393
IL8	2.41942e-06	0.00403472	-5.26729	-38.5135
CCL20	1.80733e-05	0.00659618	-4.76287	-27.1498
AQP9	0.00024939	0.0199252	-4.59969	-24.2462
MMP1	1.40567e-05	0.00602376	-4.58624	-24.0212
FGF1	1.60224e-05	0.00619099	-4.20286	-18.4157
MMP11	6.57308e-08	0.00120577	-4.14443	-17.6848
RND1	1.86983e-05	0.00659618	-4.14429	-17.683
MMP7	5.49131e-05	0.010175	-4.07881	-16.8984
IGKV3-20	0.000454888	0.0267451	-4.02698	-16.302
RIMS4	4.64339e-06	0.00532365	-3.97706	-15.7477
IGFN1	2.8348e-05	0.00755675	-3.92705	-15.211
NR4A3	1.69089e-05	0.00633013	-3.90315	-14.9612
MTUS2	2.92761e-05	0.00762071	-3.77761	-13.7143
TMEM215	8.95669e-05	0.0132689	-3.71663	-13.1467
IGHG3	0.000398097	0.0251817	-3.71053	-13.0913
EGR3	6.09609e-06	0.00588562	-3.67623	-12.7836
ECEL1	2.46987e-07	0.00151024	-3.6008	-12.1324
CTD-3247F14.2	1.35087e-05	0.00602376	-3.59655	-12.0967
CXCL3	1.35037e-05	0.00602376	-3.57245	-11.8964
EDN2	0.000245114	0.0199252	-3.54594	-11.6798
CBLN1	2.14591e-06	0.00393647	-3.477	-11.1348
IGHG1	0.000629145	0.0309411	-3.47565	-11.1243
CRLF1	0.000551326	0.0288135	-3.41689	-10.6804
PRL	0.000996457	0.0387267	-3.41113	-10.6378
FBN3	0.00018769	0.0185107	-3.38299	-10.4323
CXCL2	0.000203344	0.0190416	-3.37172	-10.3512
COL9A1	1.25442e-05	0.00602376	-3.36244	-10.2848
IGHG2	0.00144588	0.0469364	-3.31905	-9.98006
POSTN	2.73725e-05	0.00749435	-3.23115	-9.39016
SFRP4	0.000255723	0.0202198	-3.21458	-9.28296
EGR2	7.0748e-06	0.00602376	-3.14736	-8.86033
ARSI	1.85369e-05	0.00659618	-3.14692	-8.85762
IHH	4.12886e-05	0.00890093	-3.04442	-8.25015
NPTX1	0.000248271	0.0199252	-3.02838	-8.15895
UCN2	3.88908e-06	0.00475609	-2.95944	-7.7782
ZCCHC12	0.000695814	0.0326312	-2.95868	-7.77411
OVGP1	2.35825e-05	0.00730185	-2.91684	-7.55189
FOSL1	7.4821e-06	0.00602376	-2.91377	-7.53587
KRT17	0.00111499	0.0414038	-2.80695	-6.99803
MMP9	0.000840887	0.0358726	-2.77622	-6.85057
IL6	4.9415e-05	0.00955831	-2.77323	-6.83638
LYPD1	0.00108024	0.0408576	-2.75921	-6.77026
TNF	0.000151706	0.0162019	-2.74055	-6.68324
WISP1	0.00012108	0.0150432	-2.71181	-6.55141
SLC47A1	0.0016117	0.0498829	-2.69794	-6.48877
DPP10	1.06078e-05	0.00602376	-2.6972	-6.48544
PMAIP1	7.28599e-07	0.00267309	-2.68553	-6.43318
RAB3B	1.26858e-06	0.00313298	-2.68523	-6.43182
ADRA2B	0.000118164	0.0148466	-2.65873	-6.31478
KMO	0.000223221	0.0194989	-2.64654	-6.26165
NKD1	2.29122e-07	0.00151024	-2.62681	-6.17657
CTNND2	0.00097829	0.0385102	-2.5937	-6.03645
RP11-359E10.1	5.9398e-06	0.00588562	-2.47919	-5.57585
CNTN1	0.000134286	0.0157406	-2.47234	-5.54944
KCNK15	1.26793e-05	0.00602376	-2.45923	-5.49923
GJB3	2.25847e-05	0.00730185	-2.45018	-5.46485
RP11-401P9.4	1.36632e-06	0.00313298	-2.44825	-5.45753
DUSP2	0.00110274	0.0412829	-2.44238	-5.4354
FJX1	5.63497e-07	0.0025842	-2.41625	-5.33782
EDAR	0.000221294	0.0194989	-2.4031	-5.28938
TMSB15A	2.8114e-06	0.0042866	-2.40132	-5.28286
LAMP5	4.53134e-05	0.00933966	-2.38653	-5.22897
COL26A1	0.000228206	0.0195013	-2.38214	-5.21308
NTM	8.77656e-05	0.0132689	-2.33145	-5.03311
BEX1	0.000335758	0.0232098	-2.31338	-4.97047
KLK2	0.000109921	0.0142889	-2.29389	-4.90378
TNFAIP3	0.000113371	0.0145432	-2.26853	-4.81832
CPM	0.000121369	0.0150432	-2.24812	-4.75063
BAI2	0.000750672	0.0335861	-2.23625	-4.7117
GPR183	0.000586697	0.0296421	-2.23199	-4.6978
GSDMA	0.000456368	0.0267464	-2.2296	-4.69005
PBK	3.83211e-05	0.00878703	-2.22822	-4.68555
HIST1H2BH	0.000220406	0.0194989	-2.20515	-4.61123
COL22A1	9.9586e-06	0.00602376	-2.20401	-4.60759
PFKFB4	5.83691e-05	0.0106012	-2.17558	-4.51766
MSX2	1.96091e-06	0.00393647	-2.17239	-4.50769
BCL2L15	0.00157949	0.0494439	-2.12054	-4.34857
ICAM1	0.000464968	0.0270774	-2.10996	-4.3168
SERPINA1	0.000946485	0.0378264	-2.09456	-4.27096
MYBL2	4.39007e-05	0.00925649	-2.0938	-4.2687
KLK1	0.000370752	0.0241173	-2.09272	-4.26552
PRRG3	0.000132614	0.0157406	-2.09145	-4.26177
EXO1	5.96567e-05	0.0106247	-2.08772	-4.25075
C2CD4C	3.81389e-05	0.00878703	-2.08218	-4.23447
CRABP2	0.00022677	0.0195013	-2.07975	-4.22734
TENM4	0.000433863	0.0260885	-2.07449	-4.21196
TUBB2B	0.000159384	0.0164255	-2.0715	-4.20322
RBP7	0.000429293	0.0259044	-2.04677	-4.1318
LRRN1	0.00140384	0.0463686	-2.04636	-4.13063
E2F7	0.000137125	0.0157406	-2.03645	-4.10235
FAM222A	1.46717e-05	0.00602376	-2.0359	-4.10078
CDC25C	0.000139008	0.0157406	-2.02479	-4.06933
TULP2	0.00110129	0.0412829	-2.02205	-4.06161
VASH2	2.34538e-05	0.00730185	-2.01875	-4.05233
TCL6	0.000544969	0.0288135	-2.00746	-4.02074
RTKN2	2.84243e-05	0.00755675	-2.00623	-4.01732
ESCO2	0.000510857	0.0278904	-1.99524	-3.98682
KLK6	0.00116229	0.0420532	-1.99458	-3.98499
KCNN1	9.11403e-05	0.0132689	-1.99153	-3.9766
DEPDC1	0.000156127	0.0164255	-1.98703	-3.96421
AC079780.3	0.000105381	0.014008	-1.95904	-3.88804
SEMA7A	0.000723641	0.0331511	-1.95027	-3.86446
LAMA1	4.11398e-05	0.00890093	-1.94225	-3.84306
ST8SIA2	0.00033071	0.0231127	-1.93987	-3.83671
MND1	3.03782e-06	0.0042866	-1.93642	-3.82754
FAM64A	9.11407e-05	0.0132689	-1.9335	-3.81982
SKA3	0.000144012	0.0159141	-1.92647	-3.80124
BAI1	0.000881764	0.0364115	-1.92396	-3.79463
NEK2	0.000243254	0.0199252	-1.92058	-3.78574
PKMYT1	0.000220029	0.0194989	-1.90998	-3.75803
ADAMTS14	4.17292e-05	0.00890093	-1.90952	-3.75685
KIF20A	0.00132985	0.0450088	-1.89741	-3.72544
HMGA2	0.000478184	0.0274978	-1.89502	-3.71927
NEIL3	0.000652432	0.0313899	-1.88218	-3.68632
CYP26B1	0.00130898	0.044715	-1.88047	-3.68196
CDC45	0.000103604	0.0138933	-1.86917	-3.65322
WNT7A	0.00118875	0.0425075	-1.86821	-3.6508
FBN2	9.55149e-05	0.0134662	-1.86482	-3.64223
MFAP2	0.000368115	0.0240309	-1.86412	-3.64045
CDC20	0.000142053	0.015891	-1.8632	-3.63814
ETV1	0.000400484	0.0251855	-1.86302	-3.63768
CDT1	1.04298e-05	0.00602376	-1.84141	-3.58359
UHRF1	1.53543e-05	0.00612302	-1.84138	-3.58353
ZNF469	0.000211929	0.0193722	-1.83974	-3.57945
KIAA0101	0.000168663	0.0169998	-1.8353	-3.56846
OGDHL	0.000391934	0.024964	-1.83367	-3.56442
CCNA1	0.000265918	0.0207574	-1.83345	-3.56388
DACT2	0.000341061	0.0232803	-1.82787	-3.55012
CYR61	0.00076757	0.0339285	-1.82396	-3.54053
C11orf82	2.94958e-05	0.00762071	-1.82175	-3.53509
BIRC5	0.000146892	0.0160549	-1.82106	-3.5334
BUB1B	0.000855141	0.0359787	-1.81553	-3.51988
ANO7	9.0126e-05	0.0132689	-1.81402	-3.51622
RP11-548O1.3	8.59011e-05	0.0132689	-1.81009	-3.50664
TNNT2	0.00149584	0.0477998	-1.80891	-3.50378
HHIP	0.000299826	0.0219392	-1.80851	-3.50281
NREP	9.33032e-05	0.0133715	-1.80598	-3.49666
NRP2	0.000358095	0.0237144	-1.80169	-3.48628
ZNF367	5.39039e-05	0.0100899	-1.79719	-3.47543
TCEAL5	0.000224372	0.0195013	-1.78883	-3.45534
ENC1	2.26374e-05	0.00730185	-1.78378	-3.44328
IQGAP3	0.000607702	0.0302105	-1.78357	-3.44276
GINS2	2.55743e-05	0.00749435	-1.76623	-3.40163
TK1	9.23761e-06	0.00602376	-1.76297	-3.39397
CCNB2	0.000148173	0.0160833	-1.75212	-3.36853
UBE2C	0.00049677	0.027842	-1.74741	-3.35754
C16orf59	8.42257e-06	0.00602376	-1.74263	-3.34644
TTK	0.000190382	0.0186758	-1.74064	-3.34184
ANLN	0.000957006	0.0379164	-1.73994	-3.34022
PAMR1	0.000829133	0.0355877	-1.73681	-3.33297
ASF1B	0.000198913	0.0190416	-1.73619	-3.33154
DLGAP5	0.000898322	0.0366711	-1.72198	-3.29888
MCM10	0.000498063	0.027842	-1.72133	-3.29739
TROAP	0.000897204	0.0366711	-1.71932	-3.29281
PTTG1	4.74927e-05	0.00955796	-1.71857	-3.2911
ISM1	0.000775008	0.0339551	-1.71673	-3.2869
DERL3	1.32524e-05	0.00602376	-1.7165	-3.28639
GALNT12	0.00161248	0.0498829	-1.71503	-3.28303
ADORA1	0.000882912	0.0364115	-1.71316	-3.27878
PGRMC1	0.000274106	0.021216	-1.71109	-3.27409
SHANK1	0.00023273	0.0197374	-1.70279	-3.25531
KIF23	0.000424247	0.0257554	-1.69159	-3.23013
RP11-424C20.2	0.00104544	0.0401202	-1.68753	-3.22105
RP11-710M11.1	1.35732e-06	0.00313298	-1.68622	-3.21812
AC007362.1	0.00120896	0.0427305	-1.6818	-3.20829
MELK	0.00033137	0.0231127	-1.67356	-3.19
FAM83D	0.000687262	0.0324091	-1.66823	-3.17825
ATP8B3	0.000419338	0.0256459	-1.66263	-3.16592
CCNO	0.000605103	0.030163	-1.65561	-3.15055
E2F2	0.000286843	0.0216313	-1.65167	-3.14198
XRCC2	0.000137117	0.0157406	-1.6481	-3.13421
PAG1	4.03774e-05	0.00890093	-1.64614	-3.12994
DIAPH3	0.000562368	0.0289777	-1.64418	-3.12569
WNT5A-AS1	0.0011759	0.0422128	-1.63649	-3.10908
CDCA5	0.000186906	0.0185107	-1.6327	-3.10093
REEP2	0.000154645	0.0163977	-1.63232	-3.10012
APLN	0.000365883	0.0239706	-1.62462	-3.08361
PODXL2	1.46762e-05	0.00602376	-1.62301	-3.08016
E2F1	0.000109051	0.0142888	-1.62197	-3.07795
CDH2	2.02816e-05	0.00701972	-1.62108	-3.07605
GTSE1	0.00114592	0.0417969	-1.61366	-3.06026
GRIK5	0.000778072	0.0339832	-1.61087	-3.05436
FAM111B	0.00098827	0.0386542	-1.60184	-3.03531
PCSK5	0.000214503	0.0193834	-1.59984	-3.0311
APLP1	0.000208101	0.019183	-1.59611	-3.02328
PTCH2	0.000484216	0.0277577	-1.59258	-3.01588
MRAP2	0.00135262	0.0453611	-1.58575	-3.00163
CDKN3	0.000556786	0.028934	-1.58527	-3.00065
TACSTD2	0.000364335	0.0239547	-1.58355	-2.99707
HJURP	0.00122593	0.0429989	-1.57922	-2.98808
KIF18A	0.000597137	0.0299286	-1.57402	-2.97734
CCDC85B	0.00128166	0.044193	-1.56728	-2.96346
TPX2	0.00143646	0.0468037	-1.56214	-2.95292
SPC24	0.000167111	0.0169364	-1.56029	-2.94913
FAM181A	0.00105017	0.0402177	-1.55312	-2.93451
CENPU	0.000199553	0.0190416	-1.54804	-2.9242
SLCO5A1	0.000546208	0.0288135	-1.54559	-2.91923
AURKB	0.00124695	0.0435698	-1.54451	-2.91705
RP11-736N17.4	0.000857102	0.0359787	-1.54397	-2.91596
IGDCC4	0.00117061	0.0421052	-1.54042	-2.90878
TENM3	0.000222608	0.0194989	-1.53728	-2.90246
KIF4A	0.000956354	0.0379164	-1.53402	-2.89591
HBEGF	0.00066602	0.0317337	-1.53335	-2.89457
AC074289.1	0.00119379	0.0426018	-1.52982	-2.8875
LOXL1	0.00147039	0.047238	-1.5295	-2.88686
RRM2	0.00156194	0.0494439	-1.52567	-2.87921
CCNB1	9.99751e-05	0.0136861	-1.51875	-2.86543
CA11	0.00018531	0.0184746	-1.51649	-2.86093
UBE2T	3.1359e-05	0.00788012	-1.51334	-2.8547
FOXM1	0.00106232	0.0404298	-1.50868	-2.8455
SKA1	0.00107188	0.040625	-1.50553	-2.83928
LINC01122	0.00122355	0.0429976	-1.50206	-2.83246
RNFT2	0.000343868	0.0232803	-1.49896	-2.82639
CDK1	0.000508202	0.0278904	-1.49561	-2.81984
MAD2L1	9.61663e-05	0.0134662	-1.49381	-2.81632
DPYSL4	0.000653648	0.0313899	-1.49354	-2.8158
KB-1732A1.1	0.000549136	0.0288135	-1.48995	-2.80879
ITIH5	5.10735e-05	0.00965868	-1.48242	-2.79416
CCL2	0.00101157	0.0392311	-1.47399	-2.77789
KIFC1	0.0014247	0.0466279	-1.47341	-2.77678
KHK	0.000137366	0.0157406	-1.46538	-2.76136
CDH24	9.05111e-06	0.00602376	-1.45775	-2.74679
KIF2C	0.000241086	0.0199252	-1.4548	-2.74119
WNT5A	0.000273696	0.021216	-1.44166	-2.71634
MEST	0.000228565	0.0195013	-1.43489	-2.70362
RAD51AP1	0.000517472	0.0281677	-1.43413	-2.70219
ST6GALNAC3	0.000321859	0.0228844	-1.4304	-2.69522
TMEM132A	0.000123038	0.0151477	-1.4292	-2.69296
EPHB2	0.000835111	0.0357093	-1.42912	-2.69283
NAT8L	0.000110609	0.0142889	-1.42233	-2.68019
SGOL1	0.000891108	0.0366513	-1.42227	-2.68007
ERCC6L	0.00102706	0.0397477	-1.4146	-2.66586
WDR62	0.000493682	0.027842	-1.40609	-2.65017
TNFRSF12A	0.000964182	0.0381184	-1.39768	-2.63477
AUNIP	4.05515e-05	0.00890093	-1.39176	-2.62398
TMPO-AS1	0.000415332	0.0255666	-1.38755	-2.61634
WIPF3	0.000425419	0.0257554	-1.38384	-2.60962
LMNB1	0.000151915	0.0162019	-1.38066	-2.60387
GINS1	0.000103761	0.0138933	-1.3725	-2.58919
CACNA1G-AS1	0.000385006	0.0246082	-1.37178	-2.58789
COL7A1	0.000435187	0.0260885	-1.36927	-2.58339
NDC80	0.000716865	0.0330409	-1.36684	-2.57904
AC004540.5	0.000283582	0.0216175	-1.36416	-2.57427
BFSP1	9.99583e-05	0.0136861	-1.36074	-2.56818
DYNC1I1	0.000301339	0.0219392	-1.35801	-2.56331
KCNMB4	0.000285185	0.0216175	-1.35777	-2.56289
EPHA2	0.000500417	0.027842	-1.35706	-2.56162
CENPH	1.39972e-05	0.00602376	-1.35591	-2.55958
ZBED6CL	0.000294336	0.0217714	-1.35411	-2.5564
RAD51	0.000251191	0.0199474	-1.35276	-2.554
STRIP2	0.00125735	0.0436834	-1.34728	-2.54432
CSRNP1	0.00108772	0.0410557	-1.34499	-2.54029
NFKBIA	0.000775578	0.0339551	-1.34203	-2.53507
EGFL6	0.00119603	0.0426018	-1.33091	-2.51562
HMGA1	0.000290489	0.0216615	-1.32894	-2.51217
RP11-480I12.5	0.000554236	0.0288833	-1.32769	-2.51
GGH	4.59033e-05	0.00935612	-1.32745	-2.50958
PNMA3	0.000520214	0.0282331	-1.32681	-2.50848
BGN	0.00123411	0.0432034	-1.32606	-2.50717
MDK	1.4777e-05	0.00602376	-1.32046	-2.49746
RRAD	0.000825705	0.0355557	-1.31277	-2.48418
ZWINT	0.000915932	0.0369865	-1.3113	-2.48165
OSBPL6	0.000579552	0.0295314	-1.30719	-2.4746
ASGR1	0.000193749	0.0189049	-1.30173	-2.46524
LPPR3	0.00111243	0.0414038	-1.30109	-2.46414
RP11-259N19.1	4.84567e-05	0.00955796	-1.29674	-2.45673
UCHL1	0.00141844	0.0465471	-1.29605	-2.45555
NSG1	0.00035293	0.0235608	-1.29481	-2.45345
S1PR5	0.000794817	0.034473	-1.28093	-2.42996
GJA4	0.000329551	0.0231127	-1.27959	-2.42769
CNIH2	0.000138567	0.0157406	-1.27888	-2.42651
POC1A	2.49309e-05	0.00749435	-1.27833	-2.42558
ORC1	0.000737252	0.0334756	-1.27241	-2.41565
CD8A	0.00106224	0.0404298	-1.26532	-2.40381
CDC6	0.00137749	0.04588	-1.25363	-2.3844
SLC29A4	0.000249825	0.0199252	-1.2533	-2.38386
FOLH1	3.67782e-05	0.00876181	-1.25281	-2.38305
LFNG	0.00022168	0.0194989	-1.25111	-2.38025
TACC3	0.00023809	0.0199252	-1.25086	-2.37984
RAB39B	0.000849722	0.0359741	-1.24801	-2.37513
THY1	0.000243965	0.0199252	-1.23921	-2.36069
PLK2	0.000499627	0.027842	-1.23496	-2.35375
DGAT2	0.000288905	0.0216313	-1.22935	-2.34462
ZNF704	0.00157723	0.0494439	-1.21697	-2.32458
MTFR2	0.0001294	0.0157406	-1.21303	-2.31824
MCM2	0.000347286	0.0233356	-1.20616	-2.30723
AC004381.6	0.00120723	0.0427305	-1.20458	-2.30469
PHYHIP	0.00078261	0.0341003	-1.1989	-2.29565
NTN1	0.000868174	0.036195	-1.19653	-2.29188
HS6ST2	0.000279338	0.0214401	-1.19607	-2.29114
GPC2	0.00120724	0.0427305	-1.19418	-2.28815
KLF10	0.000277325	0.021375	-1.19102	-2.28314
HELLS	0.000881199	0.0364115	-1.18477	-2.27328
FANCA	0.00116577	0.0420781	-1.17556	-2.2588
BBC3	0.0012204	0.0429692	-1.16869	-2.24808
GDPD1	0.000353207	0.0235608	-1.16531	-2.24281
C4orf48	0.000378655	0.0242869	-1.16331	-2.23971
CTGF	0.00128692	0.0442392	-1.15909	-2.23317
CD6	0.00151012	0.0480311	-1.15537	-2.22741
APOLD1	0.00131589	0.0448574	-1.15191	-2.22208
NFKBIE	0.000249439	0.0199252	-1.1496	-2.21852
PRKCQ-AS1	0.000938182	0.0375764	-1.14266	-2.20788
CNIH3	0.00045024	0.0266888	-1.13982	-2.20354
BLM	0.00115415	0.0418616	-1.13655	-2.19854
CHAF1B	0.000158128	0.0164255	-1.13172	-2.19119
HES6	0.00021389	0.0193834	-1.12545	-2.1817
TYMS	0.00048748	0.027842	-1.12443	-2.18016
RNASEH2A	5.61397e-06	0.00588562	-1.12378	-2.17917
TMEM160	0.00114454	0.0417969	-1.12275	-2.17762
SLC2A11	0.000533315	0.0287739	-1.12212	-2.17666
TMEM88	0.00114637	0.0417969	-1.11816	-2.1707
DNAJC22	0.00112982	0.0417969	-1.1153	-2.1664
EVA1B	0.000202354	0.0190416	-1.11505	-2.16602
ISOC1	8.11636e-05	0.0130602	-1.11155	-2.16077
RP1-228H13.5	4.16816e-05	0.00890093	-1.1092	-2.15726
CCNE1	0.00138595	0.0460576	-1.09571	-2.13719
WDR76	0.000444626	0.0265675	-1.09171	-2.13126
UBE2S	0.0003	0.0219392	-1.09068	-2.12975
LEF1-AS1	0.0014899	0.0476975	-1.07892	-2.11245
GCLC	0.000851109	0.0359741	-1.07741	-2.11024
AC005943.5	0.00056716	0.0290395	-1.07206	-2.10243
SV2A	0.000883291	0.0364115	-1.06779	-2.09622
CENPN	0.000637703	0.0310123	-1.06418	-2.09098
NETO2	0.00065596	0.0314176	-1.05669	-2.08016
RP11-1008C21.2	0.00129038	0.0442443	-1.04994	-2.07045
TCEAL7	0.000376444	0.0242869	-1.04839	-2.06822
EGFLAM	0.0011325	0.0417969	-1.04083	-2.05742
TRAIP	0.000203948	0.0190416	-1.03923	-2.05513
FUOM	0.000601071	0.0300437	-1.03496	-2.04905
RECQL4	0.000509448	0.0278904	-1.03416	-2.04792
NRGN	0.000319406	0.0227984	-1.03231	-2.04529
FOXL2	0.000233483	0.0197374	-1.03128	-2.04383
KIAA1467	0.000697309	0.0326312	-1.02635	-2.03686
LRRC20	0.000166531	0.0169364	-1.01917	-2.02675
TIPIN	3.41296e-06	0.00447196	-1.01441	-2.02008
EMID1	0.00143985	0.0468308	-1.00404	-2.00561
UBE2SP2	0.000500158	0.027842	-1.00386	-2.00535
TCF7	0.00110239	0.0412829	-1.00044	-2.00061
CENPW	0.00114533	0.0417969	-0.999816	-1.99975
STMN1	0.000550625	0.0288135	-0.99704	-1.9959
H2AFX	2.711e-05	0.00749435	-0.996812	-1.99559
C19orf48	1.25729e-05	0.00602376	-0.995316	-1.99352
PLAU	0.00074283	0.0334803	-0.992459	-1.98957
RPL39L	0.0011135	0.0414038	-0.989887	-1.98603
CD320	8.96475e-05	0.0132689	-0.98726	-1.98242
PAFAH1B3	8.7201e-05	0.0132689	-0.980994	-1.97383
SYCE1L	0.0013781	0.04588	-0.976306	-1.96742
FDXR	0.000162243	0.0166267	-0.971713	-1.96117
CBX2	0.000987347	0.0386542	-0.970866	-1.96002
HCFC1R1	0.00121892	0.0429692	-0.96301	-1.94937
PCNA	2.28845e-05	0.00730185	-0.943286	-1.9229
FEN1	0.000567972	0.0290395	-0.933736	-1.91022
DSCC1	9.49053e-05	0.0134662	-0.932392	-1.90844
RP11-421F16.3	0.000130305	0.0157406	-0.930849	-1.9064
HEPH	0.00114373	0.0417969	-0.922982	-1.89603
SAC3D1	0.000261651	0.0205997	-0.918899	-1.89067
CKS1B	4.81525e-05	0.00955796	-0.91815	-1.88969
RFC3	0.000849445	0.0359741	-0.914752	-1.88524
CHAF1A	0.000653671	0.0313899	-0.911504	-1.88101
STAP2	0.00015039	0.0162019	-0.91101	-1.88036
RP11-669B18.1	0.00126393	0.0437462	-0.905208	-1.87281
ACTRT3	0.00125139	0.0436417	-0.882507	-1.84358
TMSB15B	0.000957006	0.0379164	-0.876754	-1.83624
UBE2SP1	0.000446808	0.0266112	-0.875969	-1.83524
RP11-14N7.2	0.00130032	0.0445021	-0.874156	-1.83293
DLC1	0.000627068	0.0309219	-0.863407	-1.81933
RPS19P1	0.000855977	0.0359787	-0.854861	-1.80858
RRM1	0.000424496	0.0257554	-0.853992	-1.8075
RP11-298C3.2	3.26769e-05	0.00810034	-0.850576	-1.80322
NUDT1	0.000758785	0.0337026	-0.850555	-1.80319
TMEM206	0.000102585	0.0138933	-0.849653	-1.80207
TCN2	0.00128782	0.0442392	-0.849483	-1.80186
NAT14	0.000357979	0.0237144	-0.848935	-1.80117
NRM	3.33654e-05	0.0081549	-0.848455	-1.80057
MYL6B	3.13263e-05	0.00788012	-0.843159	-1.79397
MAFG-AS1	0.00114837	0.0417969	-0.838547	-1.78825
RCN1	0.000754888	0.0336588	-0.836583	-1.78582
LMNB2	0.000904814	0.0368025	-0.835284	-1.78421
MMAB	0.0013377	0.0451179	-0.833083	-1.78149
MZT2A	8.81567e-05	0.0132689	-0.831887	-1.78001
RP5-1125A11.1	0.000494343	0.027842	-0.828705	-1.77609
LINC00857	0.00111119	0.0414038	-0.82737	-1.77445
H2AFZ	2.12373e-05	0.00721439	-0.819734	-1.76508
PTMS	0.00120827	0.0427305	-0.816082	-1.76062
UQCC2	0.000987147	0.0386542	-0.813696	-1.75771
RFC4	0.000131644	0.0157406	-0.796381	-1.73674
BCL2L12	7.09341e-06	0.00602376	-0.795499	-1.73568
POLA2	0.000291919	0.02168	-0.794059	-1.73395
SNRPEP2	0.000263635	0.0206672	-0.78241	-1.72
NPM3	0.000718142	0.0330409	-0.773431	-1.70933
RP11-570P14.1	0.00142853	0.0466279	-0.76981	-1.70505
STRA13	0.000672803	0.0318912	-0.769266	-1.7044
XXYLT1	0.000718672	0.0330409	-0.762103	-1.69596
POLD1	0.000550986	0.0288135	-0.760526	-1.69411
MGMT	0.000452477	0.0266888	-0.758188	-1.69136
MARCKS	0.000396373	0.0251594	-0.758085	-1.69124
NDC1	7.64514e-05	0.0124753	-0.751698	-1.68377
SDSL	0.000506228	0.0278904	-0.748773	-1.68036
CHCHD6	0.00151079	0.0480311	-0.741117	-1.67147
CDCA4	0.00113763	0.0417969	-0.734889	-1.66427
NMT2	0.00125385	0.0436444	-0.731594	-1.66047
AZI1	0.00132644	0.0449763	-0.730616	-1.65935
DTYMK	0.000452342	0.0266888	-0.728874	-1.65735
MARCKSL1	0.00142756	0.0466279	-0.725557	-1.65354
RANBP1	0.000147035	0.0160549	-0.723825	-1.65156
QDPR	0.000950229	0.0378935	-0.708063	-1.63361
KIF9	0.000804556	0.0348084	-0.705656	-1.63089
RCN2	0.000195803	0.0190043	-0.704667	-1.62977
CEP78	0.000741647	0.0334803	-0.701562	-1.62626
HAUS1	0.000316287	0.022664	-0.693181	-1.61684
PLGRKT	0.000559627	0.0289777	-0.692574	-1.61616
DBN1	0.00140146	0.0463686	-0.689439	-1.61266
UXS1	0.000308801	0.0222922	-0.688935	-1.61209
C9orf16	0.000540422	0.0288135	-0.686728	-1.60963
PPIL1	0.000637621	0.0310123	-0.685876	-1.60868
THOC6	0.000755966	0.0336588	-0.682596	-1.60503
MCM3	0.00136644	0.0456576	-0.682358	-1.60476
RPA3	0.000899587	0.0366711	-0.676925	-1.59873
SEMA4F	0.00146387	0.0471108	-0.673549	-1.59499
PTGR1	0.00061755	0.0305346	-0.672415	-1.59374
KIF22	0.0014983	0.0477998	-0.670952	-1.59212
TGIF2	0.00118012	0.0422814	-0.670793	-1.59195
RP11-73E17.2	0.00127263	0.0439645	-0.664012	-1.58448
YEATS4	0.00021951	0.0194989	-0.660633	-1.58078
H2AFY2	0.000242448	0.0199252	-0.64942	-1.56854
RAB34	0.00053952	0.0288135	-0.642709	-1.56126
SNRPEP4	0.000584154	0.0296014	-0.627384	-1.54476
RFC2	0.000400903	0.0251855	-0.624259	-1.54142
SLC25A5	0.000136104	0.0157406	-0.616724	-1.53339
HEBP1	0.000996269	0.0387267	-0.612901	-1.52933
UROS	0.000689588	0.0324354	-0.612785	-1.52921
CKAP4	0.00145169	0.0469662	-0.604557	-1.52051
LSM2	0.000913773	0.0369865	-0.599992	-1.51571
LSM5	0.00141241	0.0465157	-0.595443	-1.51094
WRAP53	0.000703183	0.0328224	-0.591591	-1.50691
NABP2	0.000199561	0.0190416	-0.566981	-1.48142
C4orf27	0.000588187	0.0296421	-0.54215	-1.45614
GABPB2	0.00157372	0.0494439	0.445562	1.36184
KANSL1L	0.000568316	0.0290395	0.59596	1.51148
ARNT	0.000143175	0.0159141	0.621165	1.53812
AGO4	0.000336557	0.0232098	0.62513	1.54235
UBN2	0.00131804	0.0448574	0.630226	1.54781
SSH3	0.00144821	0.0469364	0.635082	1.55303
TPCN1	0.00145711	0.0469809	0.676344	1.59808
OGT	0.000747365	0.0335861	0.70873	1.63436
HIPK3	0.000639045	0.0310123	0.70874	1.63438
RP3-368A4.5	0.00132356	0.0449619	0.726045	1.6541
TRANK1	0.00072653	0.0331529	0.726341	1.65444
VPS13D	0.000864255	0.0361137	0.735166	1.66459
ZNF137P	0.00160016	0.0498359	0.738891	1.66889
ZNF841	0.000309884	0.0222922	0.754205	1.6867
AL353898.2	0.00148611	0.0476594	0.760298	1.69384
MED13L	1.3545e-05	0.00602376	0.763212	1.69727
MYO9A	0.000301389	0.0219392	0.773829	1.7098
MKLN1-AS	0.00116756	0.0420781	0.777306	1.71393
WDFY3	7.55672e-05	0.0124753	0.784955	1.72304
VPS13C	0.000643974	0.031169	0.797821	1.73847
TOB1	0.000323548	0.0229157	0.802603	1.74425
ZNF471	0.000341889	0.0232803	0.803494	1.74532
PLEKHM1P	0.000860091	0.0360217	0.814597	1.75881
ARNTL	0.00161255	0.0498829	0.825514	1.77217
MGLL	0.000750073	0.0335861	0.832773	1.78111
RP11-379B18.5	0.00110267	0.0412829	0.834735	1.78353
EZH1	9.09754e-05	0.0132689	0.836181	1.78532
USP47	7.36728e-05	0.0124753	0.836305	1.78547
RP3-467L1.6	0.00161043	0.0498829	0.842523	1.79318
AC005253.2	0.00156582	0.0494439	0.855207	1.80902
RORA	0.000343925	0.0232803	0.879522	1.83977
MPZL3	0.00092465	0.0371155	0.881453	1.84223
PSTK	0.000658016	0.031434	0.884025	1.84552
PLXNA3	0.000245797	0.0199252	0.886098	1.84817
FGD4	0.000830328	0.0355877	0.888545	1.85131
STAG3L5P	0.000634031	0.0310123	0.894819	1.85938
RP11-449P15.2	0.00134818	0.0452948	0.897414	1.86272
SECISBP2L	0.000407611	0.0253465	0.910403	1.87957
ENTPD5	0.000204491	0.0190416	0.91896	1.89075
MYO5C	7.61786e-05	0.0124753	0.926227	1.9003
ELK4	0.000898878	0.0366711	0.926309	1.90041
TMEM63A	2.67277e-05	0.00749435	0.928914	1.90384
ZNF337	0.000596669	0.0299286	0.955664	1.93947
KIAA1377	4.95006e-05	0.00955831	0.958878	1.9438
ZEB1	0.000305988	0.022186	0.965135	1.95225
RP11-435F17.3	0.00156726	0.0494439	0.968461	1.95675
KIFC2	0.00133799	0.0451179	0.977379	1.96888
CAPN3	0.000582751	0.0296014	0.984608	1.97878
HELZ	0.00011681	0.0147776	0.988311	1.98386
RP11-448G15.3	0.000473476	0.0273127	1.0002	2.00027
RP11-864J10.4	0.000718063	0.0330409	1.00668	2.00928
RGPD8	0.000762785	0.0337984	1.01871	2.02611
AL592183.1	0.00115471	0.0418616	1.03202	2.04488
TCP11L2	0.000847754	0.0359741	1.03341	2.04686
RP11-2H8.2	0.00105469	0.0403069	1.03488	2.04894
KLF8	0.000510276	0.0278904	1.03543	2.04972
CRYBG3	0.000794924	0.034473	1.039	2.0548
AC011290.5	0.00103721	0.039919	1.0404	2.0568
UBE2Q2P1	0.000239234	0.0199252	1.04713	2.06641
SLC23A3	0.000142069	0.015891	1.04865	2.06859
RP13-104F24.3	0.000404402	0.0252325	1.05118	2.07223
TBCK	3.77637e-05	0.00878703	1.07111	2.10106
AASS	1.16736e-05	0.00602376	1.14022	2.20415
RP11-600F24.7	0.00063759	0.0310123	1.15431	2.22579
MLANA	0.000500865	0.027842	1.16094	2.23603
RP11-474D14.2	0.00156997	0.0494439	1.18566	2.27468
SGSM1	0.000705565	0.0328499	1.18843	2.27904
DSTNP1	0.000176438	0.0176862	1.19702	2.29266
KSR1	5.96365e-05	0.0106247	1.19982	2.29711
SLIT3	0.000346936	0.0233356	1.20362	2.30316
PRDM8	0.00054241	0.0288135	1.21289	2.31801
SVOPL	0.00103543	0.039919	1.23384	2.35192
RASEF	0.00156249	0.0494439	1.23607	2.35555
RORC	7.68482e-05	0.0124753	1.25368	2.38449
CSPG4P11	0.000212266	0.0193722	1.25462	2.38605
RP11-963H1.1	1.3807e-05	0.00602376	1.26275	2.39952
IL6ST	0.000469582	0.0272595	1.27912	2.42692
RP11-815J21.1	0.0015963	0.0498003	1.29664	2.45656
AC093690.1	0.000287791	0.0216313	1.31927	2.49539
CDKL2	0.000419416	0.0256459	1.32362	2.50294
ERP27	0.00141665	0.0465471	1.32781	2.51022
FHDC1	0.00090697	0.0368086	1.33549	2.52362
ZNF888	0.000227059	0.0195013	1.33935	2.53037
TLR4	0.00134302	0.0452044	1.35985	2.56659
RPS6KA5	0.000508586	0.0278904	1.39339	2.62695
LPIN3	7.05502e-05	0.0123255	1.3936	2.62734
RASSF6	0.000134879	0.0157406	1.40431	2.6469
PLEKHH2	0.000413701	0.0255519	1.42065	2.67705
DLG5	0.000769813	0.0339458	1.43069	2.69576
RP11-627G23.1	0.00145727	0.0469809	1.43774	2.70896
SYNE2	0.00140542	0.0463686	1.43953	2.71233
GCNT4	0.000871434	0.0362485	1.46264	2.75613
RP11-106M3.2	9.68732e-06	0.00602376	1.46399	2.7587
RN7SL648P	0.00126043	0.0437077	1.48337	2.79601
RP11-526I2.5	0.000207383	0.019183	1.49497	2.81858
LINC00598	0.00158977	0.049681	1.50343	2.83515
ABO	0.000159276	0.0164255	1.52655	2.88097
NABP1	0.000523913	0.02835	1.53968	2.9073
RP11-439E19.10	9.89637e-05	0.0136861	1.5591	2.94669
KIF28P	0.000684767	0.0323746	1.58925	3.00893
RP11-510D19.1	0.000334303	0.0232098	1.61031	3.05318
IGSF11	0.00107067	0.040625	1.6333	3.10221
SCTR	0.000991871	0.0387125	1.63774	3.11179
RP11-182J1.14	2.73616e-05	0.00749435	1.6648	3.17069
FGF10	0.00135582	0.0453855	1.67112	3.18462
WNT9B	0.00157779	0.0494439	1.67977	3.20378
RIMBP2	0.000116224	0.0147776	1.72145	3.29769
LRRC31	0.000739528	0.0334803	1.78271	3.44071
PRKXP1	2.63022e-05	0.00749435	1.81295	3.51361
P2RY1	0.000775407	0.0339551	1.81516	3.51899
RP11-430C7.5	1.61997e-05	0.00619099	1.85092	3.60731
CP	0.00103801	0.039919	1.88886	3.70342
FGF7	0.0014003	0.0463686	1.91458	3.77004
AC073218.2	0.000541929	0.0288135	1.93001	3.81059
RP11-66B24.4	1.08823e-05	0.00602376	1.97281	3.92532
RIMS2	9.11395e-05	0.0132689	1.99918	3.99773
LIPI	5.62521e-05	0.0103189	1.9992	3.99779
ORAOV1P1	0.000158281	0.0164255	2.00021	4.00058
RP11-815J21.4	3.37861e-05	0.0081549	2.02479	4.06934
RP11-411K7.1	0.000493105	0.027842	2.02722	4.07619
ACVR1C	0.0011335	0.0417969	2.03095	4.08675
GRAMD1C	0.000138007	0.0157406	2.05163	4.14575
LINGO4	5.01035e-05	0.00957393	2.05487	4.15505
CTD-2114J12.1	0.000724683	0.0331511	2.06574	4.1865
FILIP1	7.36978e-05	0.0124753	2.09584	4.27474
RIMKLBP1	0.000240317	0.0199252	2.12753	4.36969
PCA3	0.000922165	0.0370969	2.12881	4.37356
RIMKLB	0.000341973	0.0232803	2.15992	4.46889
AC112229.1	2.38831e-05	0.00730185	2.19602	4.58212
OR1Q1	0.000560992	0.0289777	2.25711	4.78032
RP11-426A6.5	0.000668419	0.0317655	2.28457	4.8722
RP11-20D14.6	0.000610125	0.030249	2.31008	4.95911
RP11-54F2.1	7.32785e-05	0.0124753	2.35219	5.106
CTD-2008P7.9	9.22273e-05	0.0133214	2.36138	5.13862
RP11-44K6.3	0.000202234	0.0190416	2.41589	5.33648
NANOGP7	0.000471557	0.0272878	2.44292	5.43742
RP11-542K23.9	0.000108138	0.0142711	2.46643	5.52674
AC013268.3	7.58768e-05	0.0124753	2.58953	6.01901
AF064858.6	0.000817016	0.0352643	2.66552	6.34457
MTND4P20	0.000462998	0.0270485	2.72943	6.63194
RP11-248B24.4	0.000375549	0.0242869	2.73001	6.63461
MBOAT4	0.000917403	0.0369865	2.76854	6.81416
RPL17P22	0.000329864	0.0231127	2.77523	6.84584
HAVCR1	0.000537812	0.0288135	2.79752	6.95245
AC073218.3	1.36014e-05	0.00602376	2.81593	7.04173
CD177	0.000969669	0.0382529	2.89362	7.43135
RP11-460N16.1	0.000732469	0.033341	2.92423	7.59067
IDO2	0.000410927	0.0254664	2.93781	7.66248
RP11-557H15.3	0.000377714	0.0242869	3.09613	8.55124
SLCO4C1	4.52265e-05	0.00933966	3.21208	9.26687
RP11-474B16.1	0.000360919	0.0238155	3.56065	11.7995
RP11-365H8.2	0.000711585	0.0330409	3.74217	13.3816
RNU6-831P	6.74838e-05	0.0119031	4.73447	26.6206
hsa-mir-6723	0.00040285	0.0252214	5.13222	35.0713
MTND1P23	0.000284907	0.0216175	6.50407	90.7654
*FC: indicates downregulated genes calculated as -POWER(2,-logFC)
