# Supplementary material for: Disrupted PGR-B and ESR1 signaling underlies defective decidualization linked to severe preeclampsia
Source: eLife. 2021 Oct 28;10:e70753. doi: 10.7554/eLife.70753 (PMC8553341; doi:10.7554/eLife.70753)
Supplement: Figure 3—source data 2. [file elife-70753-fig3-data2.xlsx]

## Sheet: Sheet1
Figure 3- Source data 2. Biological process GO terms computed by the 120 genes included in the DD-fingerprinting in sPE (N, number of genes associated to GO term; DE, number of genes differentially expressed in this GO term; P.DE, p-value; FDR, adjusted p-value).
GO term down-regulated in sPE	Definition	N	DE	P.DE	FDR	EntrezID	Gene symbol
GO:0030198	extracellular matrix organization	348	13	2.80661e-08	0.000359242	1297|2201|3549|3817|4312|4314|4316|4320|7124|10631|140766|169044|284217	ADAMTS14|COL22A1|COL9A1|FBN2|IHH|KLK2|LAMA1|MMP1|MMP11|MMP3|MMP7|POSTN|TNF
GO:0007049	cell cycle	1782	28	5.78623e-08	0.000439599	332|891|991|995|1869|3576|4085|4488|4605|7124|7128|7516|8013|8061|8318|9133|9156|9232|25886|29128|54962|55872|79000|81620|84057|144455|221150|347733	AUNIP|BIRC5|CCNB1|CCNB2|CDC20|CDC25C|CDC45|CDT1|E2F1|E2F7|EXO1|FOSL1|IL8|MAD2L1|MND1|MSX2|MYBL2|NR4A3|PBK|POC1A|PTTG1|SKA3|TIPIN|TNF|TNFAIP3|TUBB2B|UHRF1|XRCC2
GO:0043062	extracellular structure organization	402	13	1.50228e-07	0.000856001	1297|2201|3549|3817|4312|4314|4316|4320|7124|10631|140766|169044|284217	ADAMTS14|COL22A1|COL9A1|FBN2|IHH|KLK2|LAMA1|MMP1|MMP11|MMP3|MMP7|POSTN|TNF
GO:0045787	positive regulation of cell cycle	390	12	7.90575e-07	0.00300313	891|995|1869|4085|4488|8013|8061|8318|9133|25886|81620|144455	CCNB1|CCNB2|CDC25C|CDC45|CDT1|E2F1|E2F7|FOSL1|MAD2L1|MSX2|NR4A3|POC1A
GO:0032963	collagen metabolic process	106	7	1.25154e-06	0.00310176	3549|3569|4312|4314|4316|4320|140766	ADAMTS14|IHH|IL6|MMP1|MMP11|MMP3|MMP7
GO:0006508	proteolysis	1842	26	1.53173e-06	0.00310176	332|891|991|1368|2346|3549|3817|4085|4312|4314|4316|4320|5366|7124|7128|8507|8836|9232|9427|29128|55872|57628|79805|80760|91319|140766	ADAMTS14|BIRC5|CCNB1|CDC20|CPM|DERL3|DPP10|ECEL1|ENC1|FOLH1|GGH|IHH|ITIH5|KLK2|MAD2L1|MMP1|MMP11|MMP3|MMP7|PBK|PMAIP1|PTTG1|TNF|TNFAIP3|UHRF1|VASH2
GO:2000816	negative regulation of mitotic sister chromatid separation	39	5	1.64087e-06	0.00310176	891|991|4085|9232|81620	CCNB1|CDC20|CDT1|MAD2L1|PTTG1
GO:0000278	mitotic cell cycle	954	18	1.65838e-06	0.00310176	891|991|995|1869|4085|4605|7124|7516|8318|9133|9232|25886|54962|55872|81620|144455|221150|347733	CCNB1|CCNB2|CDC20|CDC25C|CDC45|CDT1|E2F1|E2F7|MAD2L1|MYBL2|PBK|POC1A|PTTG1|SKA3|TIPIN|TNF|TUBB2B|XRCC2
GO:0048522	positive regulation of cellular process	5330	50	1.73098e-06	0.00310176	151|332|869|891|991|995|1000|1272|1869|1907|1959|1960|2201|2246|3549|3569|3576|4085|4192|4312|4314|4488|4605|5210|5366|5865|6364|6424|7124|7128|7516|8013|8061|8318|8507|8564|9133|10631|10913|25886|29128|54962|55824|79805|81620|85407|140730|144455|219790|347733	ADRA2B|BIRC5|CBLN1|CCL20|CCNB1|CCNB2|CDC20|CDC25C|CDC45|CDH2|CDT1|CNTN1|E2F1|E2F7|EDAR|EDN2|EGR2|EGR3|ENC1|FBN2|FGF1|FOSL1|IHH|IL6|IL8|KMO|MAD2L1|MDK|MMP1|MMP3|MSX2|MYBL2|NKD1|NR4A3|PAG1|PFKFB4|PMAIP1|POC1A|POSTN|RAB3B|RIMS4|RTKN2|SFRP4|TIPIN|TNF|TNFAIP3|TUBB2B|UHRF1|VASH2|XRCC2
GO:0000075	cell cycle checkpoint	216	9	1.76037e-06	0.00310176	891|991|995|1869|4085|8318|54962|81620|144455	CCNB1|CDC20|CDC25C|CDC45|CDT1|E2F1|E2F7|MAD2L1|TIPIN
GO:1905819	negative regulation of chromosome separation	40	5	1.86764e-06	0.00310176	891|991|4085|9232|81620	CCNB1|CDC20|CDT1|MAD2L1|PTTG1
GO:0045930	negative regulation of mitotic cell cycle	281	10	1.90526e-06	0.00310176	891|991|995|1869|4085|7124|9232|54962|81620|144455	CCNB1|CDC20|CDC25C|CDT1|E2F1|E2F7|MAD2L1|PTTG1|TIPIN|TNF
GO:0030574	collagen catabolic process	41	5	2.11837e-06	0.00321078	4312|4314|4316|4320|140766	ADAMTS14|MMP1|MMP11|MMP3|MMP7
GO:0007093	mitotic cell cycle checkpoint	166	8	2.31004e-06	0.00321078	891|991|995|1869|4085|54962|81620|144455	CCNB1|CDC20|CDC25C|CDT1|E2F1|E2F7|MAD2L1|TIPIN
GO:0033048	negative regulation of mitotic sister chromatid segregation	42	5	2.39484e-06	0.00321078	891|991|4085|9232|81620	CCNB1|CDC20|CDT1|MAD2L1|PTTG1
GO:0033046	negative regulation of sister chromatid segregation	44	5	3.03253e-06	0.00383986	891|991|4085|9232|81620	CCNB1|CDC20|CDT1|MAD2L1|PTTG1
GO:0051985	negative regulation of chromosome segregation	45	5	3.39771e-06	0.00407182	891|991|4085|9232|81620	CCNB1|CDC20|CDT1|MAD2L1|PTTG1
GO:0033554	cellular response to stress	1928	26	3.57302e-06	0.00407182	891|995|1869|2246|3569|3576|4314|5366|7124|7128|7516|8013|8318|9156|9232|9315|10535|10913|29089|29128|51659|54962|55872|79000|91319|144455	AUNIP|CCNB1|CDC25C|CDC45|DERL3|E2F1|E2F7|EDAR|EXO1|FGF1|GINS2|IL6|IL8|MMP3|NR4A3|NREP|PBK|PMAIP1|PTTG1|RNASEH2A|TIPIN|TNF|TNFAIP3|UBE2T|UHRF1|XRCC2
GO:0016043	cellular component organization	6334	55	4.19683e-06	0.00455496	869|891|991|995|1000|1272|1297|1869|1959|2201|3549|3569|3817|4085|4312|4314|4316|4320|4488|4605|4884|5366|5865|6424|7083|7124|7128|7516|8013|8061|8318|8507|8840|9133|9156|9232|9315|10631|11013|25886|27289|29128|50636|51308|51659|64403|64946|79000|81620|84057|140766|169044|221150|284217|347733	ADAMTS14|ANO7|AUNIP|CBLN1|CCNB1|CCNB2|CDC20|CDC25C|CDC45|CDH2|CDH24|CDT1|CENPH|CNTN1|COL22A1|COL9A1|E2F1|EGR2|ENC1|EXO1|FBN2|FOSL1|GINS2|IHH|IL6|KLK2|LAMA1|MAD2L1|MMP1|MMP11|MMP3|MMP7|MND1|MSX2|MYBL2|NPTX1|NR4A3|NREP|PMAIP1|POC1A|POSTN|PTTG1|RAB3B|REEP2|RND1|SFRP4|SKA3|TK1|TMSB15A|TNF|TNFAIP3|TUBB2B|UHRF1|WISP1|XRCC2
GO:0010033	response to organic substance	3172	35	4.66556e-06	0.00460563	332|366|891|1869|1907|1959|1960|2201|2246|2707|2920|2921|3549|3569|3576|4192|4312|4314|4488|4605|5366|6364|6424|7124|7128|8013|8061|8564|8836|9315|10631|10913|81620|90226|91319	AQP9|BIRC5|CCL20|CCNB1|CDT1|CXCL2|CXCL3|DERL3|E2F1|EDAR|EDN2|EGR2|EGR3|FBN2|FGF1|FOSL1|GGH|GJB3|IHH|IL6|IL8|KMO|MDK|MMP1|MMP3|MSX2|MYBL2|NR4A3|NREP|PMAIP1|POSTN|SFRP4|TNF|TNFAIP3|UCN2
GO:0051716	cellular response to stimulus	7432	61	4.85392e-06	0.00460563	151|332|366|869|891|995|1000|1272|1869|1907|1959|1960|2201|2246|2707|2920|2921|3549|3569|3576|4192|4312|4314|4316|4488|4605|4884|5366|5865|6364|6424|7124|7128|7516|8013|8061|8318|8564|8840|9156|9232|9315|9427|10535|10631|10913|27289|29089|29128|51659|54962|55635|55824|55872|79000|85407|90226|91319|144455|219790|284217	ADRA2B|AQP9|AUNIP|BIRC5|CBLN1|CCL20|CCNB1|CDC25C|CDC45|CDH2|CNTN1|CXCL2|CXCL3|DEPDC1|DERL3|E2F1|E2F7|ECEL1|EDAR|EDN2|EGR2|EGR3|EXO1|FBN2|FGF1|FOSL1|GINS2|GJB3|IHH|IL6|IL8|KMO|LAMA1|MDK|MMP1|MMP3|MMP7|MSX2|MYBL2|NKD1|NPTX1|NR4A3|NREP|PAG1|PBK|PMAIP1|POSTN|PTTG1|RAB3B|RNASEH2A|RND1|RTKN2|SFRP4|TIPIN|TNF|TNFAIP3|UBE2T|UCN2|UHRF1|WISP1|XRCC2
GO:0006974	cellular response to DNA damage stimulus	830	16	5.13436e-06	0.00460563	891|995|1869|5366|7124|7516|8318|9156|9232|10535|29089|29128|51659|54962|79000|144455	AUNIP|CCNB1|CDC25C|CDC45|E2F1|E2F7|EXO1|GINS2|PMAIP1|PTTG1|RNASEH2A|TIPIN|TNF|UBE2T|UHRF1|XRCC2
GO:0045599	negative regulation of fat cell differentiation	49	5	5.21721e-06	0.00460563	1869|3569|4320|4488|7124	E2F1|IL6|MMP11|MSX2|TNF
GO:0051726	regulation of cell cycle	1143	19	5.25387e-06	0.00460563	891|991|995|1869|3576|4085|4488|4605|7124|7128|8013|8061|8318|9133|9232|25886|54962|81620|144455	CCNB1|CCNB2|CDC20|CDC25C|CDC45|CDT1|E2F1|E2F7|FOSL1|IL8|MAD2L1|MSX2|MYBL2|NR4A3|POC1A|PTTG1|TIPIN|TNF|TNFAIP3
GO:0045839	negative regulation of mitotic nuclear division	52	5	7.02425e-06	0.0055261	891|991|4085|9232|81620	CCNB1|CDC20|CDT1|MAD2L1|PTTG1
GO:0008284	positive regulation of cell proliferation	955	17	7.24273e-06	0.0055261	332|891|991|1869|1907|1960|2246|3549|3569|7124|7128|8013|8061|9133|54962|79805|219790	BIRC5|CCNB1|CCNB2|CDC20|E2F1|EDN2|EGR3|FGF1|FOSL1|IHH|IL6|NR4A3|RTKN2|TIPIN|TNF|TNFAIP3|VASH2
GO:0051094	positive regulation of developmental process	1395	21	7.26356e-06	0.0055261	151|869|891|991|1000|1272|1869|1960|2201|2246|3549|3569|3576|4488|6424|7124|7128|7516|8507|79805|347733	ADRA2B|CBLN1|CCNB1|CDC20|CDH2|CNTN1|E2F1|EGR3|ENC1|FBN2|FGF1|IHH|IL6|IL8|MSX2|SFRP4|TNF|TNFAIP3|TUBB2B|VASH2|XRCC2
GO:0016477	cell migration	1537	22	9.41851e-06	0.00646416	1000|1907|1960|2246|2920|2921|3569|3576|4192|4312|4314|4488|6364|7124|7128|8013|10631|11013|27289|50512|284217|347733	CCL20|CDH2|CXCL2|CXCL3|EDN2|EGR3|FGF1|IL6|IL8|LAMA1|MDK|MMP1|MMP3|MSX2|NR4A3|PODXL2|POSTN|RND1|TMSB15A|TNF|TNFAIP3|TUBB2B
GO:0051783	regulation of nuclear division	201	8	9.48872e-06	0.00646416	891|991|995|4085|4488|9133|9232|81620	CCNB1|CCNB2|CDC20|CDC25C|CDT1|MAD2L1|MSX2|PTTG1
GO:0040011	locomotion	1909	25	9.66285e-06	0.00646416	1000|1907|1959|1960|2246|2920|2921|3569|3576|4192|4312|4314|4488|6364|7124|7128|8013|8061|10631|11013|27289|50512|85407|284217|347733	CCL20|CDH2|CXCL2|CXCL3|EDN2|EGR2|EGR3|FGF1|FOSL1|IL6|IL8|LAMA1|MDK|MMP1|MMP3|MSX2|NKD1|NR4A3|PODXL2|POSTN|RND1|TMSB15A|TNF|TNFAIP3|TUBB2B
GO:0051301	cell division	587	13	1.0012e-05	0.00646416	332|891|991|995|2246|4085|4192|9133|9232|54962|81620|144455|221150	BIRC5|CCNB1|CCNB2|CDC20|CDC25C|CDT1|E2F7|FGF1|MAD2L1|MDK|PTTG1|SKA3|TIPIN
GO:0045786	negative regulation of cell cycle	587	13	1.0012e-05	0.00646416	891|991|995|1869|3576|4085|7124|7128|8318|9232|54962|81620|144455	CCNB1|CDC20|CDC25C|CDC45|CDT1|E2F1|E2F7|IL8|MAD2L1|PTTG1|TIPIN|TNF|TNFAIP3
GO:0071840	cellular component organization or biogenesis	6506	55	1.02101e-05	0.00646416	869|891|991|995|1000|1272|1297|1869|1959|2201|3549|3569|3817|4085|4312|4314|4316|4320|4488|4605|4884|5366|5865|6424|7083|7124|7128|7516|8013|8061|8318|8507|8840|9133|9156|9232|9315|10631|11013|25886|27289|29128|50636|51308|51659|64403|64946|79000|81620|84057|140766|169044|221150|284217|347733	ADAMTS14|ANO7|AUNIP|CBLN1|CCNB1|CCNB2|CDC20|CDC25C|CDC45|CDH2|CDH24|CDT1|CENPH|CNTN1|COL22A1|COL9A1|E2F1|EGR2|ENC1|EXO1|FBN2|FOSL1|GINS2|IHH|IL6|KLK2|LAMA1|MAD2L1|MMP1|MMP11|MMP3|MMP7|MND1|MSX2|MYBL2|NPTX1|NR4A3|NREP|PMAIP1|POC1A|POSTN|PTTG1|RAB3B|REEP2|RND1|SFRP4|SKA3|TK1|TMSB15A|TNF|TNFAIP3|TUBB2B|UHRF1|WISP1|XRCC2
GO:0010965	regulation of mitotic sister chromatid separation	57	5	1.10882e-05	0.00683033	891|991|4085|9232|81620	CCNB1|CDC20|CDT1|MAD2L1|PTTG1
GO:0048870	cell motility	1688	23	1.2649e-05	0.00739221	1000|1907|1960|2246|2920|2921|3569|3576|4192|4312|4314|4488|6364|7124|7128|8013|10631|11013|27289|50512|85407|284217|347733	CCL20|CDH2|CXCL2|CXCL3|EDN2|EGR3|FGF1|IL6|IL8|LAMA1|MDK|MMP1|MMP3|MSX2|NKD1|NR4A3|PODXL2|POSTN|RND1|TMSB15A|TNF|TNFAIP3|TUBB2B
GO:0051674	localization of cell	1688	23	1.2649e-05	0.00739221	1000|1907|1960|2246|2920|2921|3569|3576|4192|4312|4314|4488|6364|7124|7128|8013|10631|11013|27289|50512|85407|284217|347733	CCL20|CDH2|CXCL2|CXCL3|EDN2|EGR3|FGF1|IL6|IL8|LAMA1|MDK|MMP1|MMP3|MSX2|NKD1|NR4A3|PODXL2|POSTN|RND1|TMSB15A|TNF|TNFAIP3|TUBB2B
GO:0000083	regulation of transcription involved in G1/S transition of mitotic cell cycle	29	4	1.42316e-05	0.00762365	1869|8318|81620|144455	CDC45|CDT1|E2F1|E2F7
GO:0051306	mitotic sister chromatid separation	60	5	1.42873e-05	0.00762365	891|991|4085|9232|81620	CCNB1|CDC20|CDT1|MAD2L1|PTTG1
GO:0051784	negative regulation of nuclear division	60	5	1.42873e-05	0.00762365	891|991|4085|9232|81620	CCNB1|CDC20|CDT1|MAD2L1|PTTG1
GO:0048699	generation of neurons	1459	21	1.4383e-05	0.00762365	151|869|991|1000|1272|1869|1959|3549|3569|4884|7124|7516|8013|8507|9315|10631|27289|50863|85407|284217|347733	ADRA2B|CBLN1|CDC20|CDH2|CNTN1|E2F1|EGR2|ENC1|IHH|IL6|LAMA1|NKD1|NPTX1|NR4A3|NREP|NTM|POSTN|RND1|TNF|TUBB2B|XRCC2
GO:0033993	response to lipid	908	16	1.57473e-05	0.00810109	891|1869|2707|2920|2921|3549|3569|3576|4192|4488|7124|7128|8013|8061|8564|10631	CCNB1|CXCL2|CXCL3|E2F1|FOSL1|GJB3|IHH|IL6|IL8|KMO|MDK|MSX2|NR4A3|POSTN|TNF|TNFAIP3
GO:1905818	regulation of chromosome separation	62	5	1.67907e-05	0.00810109	891|991|4085|9232|81620	CCNB1|CDC20|CDT1|MAD2L1|PTTG1
GO:0090068	positive regulation of cell cycle process	286	9	1.70609e-05	0.00810109	891|995|1869|4085|4488|8318|25886|81620|144455	CCNB1|CDC25C|CDC45|CDT1|E2F1|E2F7|MAD2L1|MSX2|POC1A
GO:0031570	DNA integrity checkpoint	158	7	1.75966e-05	0.00818492	891|995|1869|8318|54962|81620|144455	CCNB1|CDC25C|CDC45|CDT1|E2F1|E2F7|TIPIN
GO:0048646	anatomical structure formation involved in morphogenesis	1151	18	2.19219e-05	0.0099929	869|1959|1960|2201|2246|3549|3569|3576|4488|7124|7128|7516|8013|10913|24147|79805|85407|144455	CBLN1|E2F7|EDAR|EGR2|EGR3|FBN2|FGF1|FJX1|IHH|IL6|IL8|MSX2|NKD1|NR4A3|TNF|TNFAIP3|VASH2|XRCC2
GO:0033047	regulation of mitotic sister chromatid segregation	68	5	2.6395e-05	0.0108939	891|991|4085|9232|81620	CCNB1|CDC20|CDT1|MAD2L1|PTTG1
GO:0007094	mitotic spindle assembly checkpoint	34	4	2.72444e-05	0.0108939	891|991|4085|81620	CCNB1|CDC20|CDT1|MAD2L1
GO:0071174	mitotic spindle checkpoint	34	4	2.72444e-05	0.0108939	891|991|4085|81620	CCNB1|CDC20|CDT1|MAD2L1
GO:0071173	spindle assembly checkpoint	34	4	2.72444e-05	0.0108939	891|991|4085|81620	CCNB1|CDC20|CDT1|MAD2L1
GO:0031577	spindle checkpoint	34	4	2.72444e-05	0.0108939	891|991|4085|81620	CCNB1|CDC20|CDT1|MAD2L1
GO:0010469	regulation of signaling receptor activity	559	12	3.05365e-05	0.0119998	151|1907|2246|2920|2921|3569|3576|4192|4884|6364|7124|90226	ADRA2B|CCL20|CXCL2|CXCL3|EDN2|FGF1|IL6|IL8|MDK|NPTX1|TNF|UCN2
GO:0071310	cellular response to organic substance	2595	29	3.31057e-05	0.0125757	332|366|891|1869|1907|1959|1960|2201|2246|2707|2920|2921|3569|3576|4312|4314|4488|4605|6364|6424|7124|7128|8013|8564|9315|10631|10913|90226|91319	AQP9|BIRC5|CCL20|CCNB1|CXCL2|CXCL3|DERL3|E2F1|EDAR|EDN2|EGR2|EGR3|FBN2|FGF1|GJB3|IL6|IL8|KMO|MMP1|MMP3|MSX2|MYBL2|NR4A3|NREP|POSTN|SFRP4|TNF|TNFAIP3|UCN2
GO:0048518	positive regulation of biological process	6054	51	3.41258e-05	0.012621	151|332|869|891|991|995|1000|1272|1869|1907|1959|1960|2201|2246|3549|3569|3576|4085|4192|4312|4314|4488|4605|5210|5366|5865|6364|6424|7124|7128|7516|8013|8061|8318|8507|8564|9133|10631|10913|25886|29128|54962|55824|57628|79805|81620|85407|140730|144455|219790|347733	ADRA2B|BIRC5|CBLN1|CCL20|CCNB1|CCNB2|CDC20|CDC25C|CDC45|CDH2|CDT1|CNTN1|DPP10|E2F1|E2F7|EDAR|EDN2|EGR2|EGR3|ENC1|FBN2|FGF1|FOSL1|IHH|IL6|IL8|KMO|MAD2L1|MDK|MMP1|MMP3|MSX2|MYBL2|NKD1|NR4A3|PAG1|PFKFB4|PMAIP1|POC1A|POSTN|RAB3B|RIMS4|RTKN2|SFRP4|TIPIN|TNF|TNFAIP3|TUBB2B|UHRF1|VASH2|XRCC2
GO:0045841	negative regulation of mitotic metaphase/anaphase transition	36	4	3.43323e-05	0.012621	891|991|4085|81620	CCNB1|CDC20|CDT1|MAD2L1
GO:0022402	cell cycle process	1310	19	3.55477e-05	0.012625	891|991|995|1869|3576|4085|4488|4605|7516|8318|9133|9156|9232|25886|54962|79000|81620|84057|144455	AUNIP|CCNB1|CCNB2|CDC20|CDC25C|CDC45|CDT1|E2F1|E2F7|EXO1|IL8|MAD2L1|MND1|MSX2|MYBL2|POC1A|PTTG1|TIPIN|XRCC2
GO:2000026	regulation of multicellular organismal development	2064	25	3.65075e-05	0.012625	151|869|891|991|1000|1272|1869|1960|2201|2246|3549|3569|3576|4488|6424|7124|7128|7516|8013|8507|9315|79805|85407|284217|347733	ADRA2B|CBLN1|CCNB1|CDC20|CDH2|CNTN1|E2F1|EGR3|ENC1|FBN2|FGF1|IHH|IL6|IL8|LAMA1|MSX2|NKD1|NR4A3|NREP|SFRP4|TNF|TNFAIP3|TUBB2B|VASH2|XRCC2
GO:0007088	regulation of mitotic nuclear division	177	7	3.65095e-05	0.012625	891|991|995|4085|9133|9232|81620	CCNB1|CCNB2|CDC20|CDC25C|CDT1|MAD2L1|PTTG1
GO:0042127	regulation of cell proliferation	1678	22	3.66897e-05	0.012625	332|891|991|1000|1869|1907|1960|2246|3549|3569|3576|4488|6424|7124|7128|8013|8061|9133|54962|79805|144455|219790	BIRC5|CCNB1|CCNB2|CDC20|CDH2|E2F1|E2F7|EDN2|EGR3|FGF1|FOSL1|IHH|IL6|IL8|MSX2|NR4A3|RTKN2|SFRP4|TIPIN|TNF|TNFAIP3|VASH2
GO:0022008	neurogenesis	1555	21	3.71127e-05	0.012625	151|869|991|1000|1272|1869|1959|3549|3569|4884|7124|7516|8013|8507|9315|10631|27289|50863|85407|284217|347733	ADRA2B|CBLN1|CDC20|CDH2|CNTN1|E2F1|EGR2|ENC1|IHH|IL6|LAMA1|NKD1|NPTX1|NR4A3|NREP|NTM|POSTN|RND1|TNF|TUBB2B|XRCC2
GO:0031145	anaphase-promoting complex-dependent catabolic process	37	4	3.8342e-05	0.0126651	891|991|4085|9232	CCNB1|CDC20|MAD2L1|PTTG1
GO:1902100	negative regulation of metaphase/anaphase transition of cell cycle	37	4	3.8342e-05	0.0126651	891|991|4085|81620	CCNB1|CDC20|CDT1|MAD2L1
GO:0022617	extracellular matrix disassembly	74	5	3.98048e-05	0.0129604	3817|4312|4314|4316|4320	KLK2|MMP1|MMP11|MMP3|MMP7
GO:0048523	negative regulation of cellular process	4759	43	4.28174e-05	0.013745	151|332|869|891|991|995|1000|1869|1960|2201|3549|3569|3576|4085|4192|4314|4320|4488|5016|6424|7124|7128|7516|8013|8061|8318|8507|8840|9232|10631|11013|27289|29128|54962|55635|55824|55872|79000|80760|81620|85407|91319|144455	ADRA2B|AUNIP|BIRC5|CBLN1|CCNB1|CDC20|CDC25C|CDC45|CDH2|CDT1|DEPDC1|DERL3|E2F1|E2F7|EGR3|ENC1|FBN2|FOSL1|IHH|IL6|IL8|ITIH5|MAD2L1|MDK|MMP11|MMP3|MSX2|NKD1|NR4A3|OVGP1|PAG1|PBK|POSTN|PTTG1|RND1|SFRP4|TIPIN|TMSB15A|TNF|TNFAIP3|UHRF1|WISP1|XRCC2
GO:0090266	regulation of mitotic cell cycle spindle assembly checkpoint	14	3	4.62273e-05	0.014238	891|4085|81620	CCNB1|CDT1|MAD2L1
GO:1903504	regulation of mitotic spindle checkpoint	14	3	4.62273e-05	0.014238	891|4085|81620	CCNB1|CDT1|MAD2L1
GO:0090231	regulation of spindle checkpoint	14	3	4.62273e-05	0.014238	891|4085|81620	CCNB1|CDT1|MAD2L1
GO:0007267	cell-cell signaling	1584	21	4.86004e-05	0.0147693	151|869|991|1000|1959|1960|3549|3569|3780|4884|5865|6364|6424|7124|7128|8564|8840|24147|85407|140730|347733	ADRA2B|CBLN1|CCL20|CDC20|CDH2|EGR2|EGR3|FJX1|IHH|IL6|KCNN1|KMO|NKD1|NPTX1|RAB3B|RIMS4|SFRP4|TNF|TNFAIP3|TUBB2B|WISP1
GO:0033043	regulation of organelle organization	1237	18	5.63873e-05	0.0166222	869|891|991|995|1000|1869|4085|4488|5366|7124|8318|9133|9232|11013|25886|27289|81620|221150	CBLN1|CCNB1|CCNB2|CDC20|CDC25C|CDC45|CDH2|CDT1|E2F1|MAD2L1|MSX2|PMAIP1|POC1A|PTTG1|RND1|SKA3|TMSB15A|TNF
GO:0000280	nuclear division	416	10	5.72379e-05	0.0166222	891|991|995|4085|4488|4605|9133|9232|81620|84057	CCNB1|CCNB2|CDC20|CDC25C|CDT1|MAD2L1|MND1|MSX2|MYBL2|PTTG1
GO:0033045	regulation of sister chromatid segregation	80	5	5.79701e-05	0.0166222	891|991|4085|9232|81620	CCNB1|CDC20|CDT1|MAD2L1|PTTG1
GO:1901991	negative regulation of mitotic cell cycle phase transition	191	7	5.91857e-05	0.0166222	891|991|995|1869|4085|81620|144455	CCNB1|CDC20|CDC25C|CDT1|E2F1|E2F7|MAD2L1
GO:0050804	modulation of chemical synaptic transmission	418	10	5.95732e-05	0.0166222	869|991|1000|1959|4884|5865|7124|8564|140730|347733	CBLN1|CDC20|CDH2|EGR2|KMO|NPTX1|RAB3B|RIMS4|TNF|TUBB2B
GO:0007154	cell communication	6522	53	5.98027e-05	0.0166222	151|332|869|891|991|995|1000|1272|1869|1907|1959|1960|2201|2246|2707|2920|2921|3549|3569|3576|3780|4192|4312|4314|4488|4884|5366|5865|6364|6424|7124|7128|8013|8061|8564|8840|9315|9427|10631|10913|24147|27289|55635|55824|55872|85407|90226|91319|140730|144455|219790|284217|347733	ADRA2B|BIRC5|CBLN1|CCL20|CCNB1|CDC20|CDC25C|CDH2|CNTN1|CXCL2|CXCL3|DEPDC1|DERL3|E2F1|E2F7|ECEL1|EDAR|EDN2|EGR2|EGR3|FBN2|FGF1|FJX1|FOSL1|GJB3|IHH|IL6|IL8|KCNN1|KMO|LAMA1|MDK|MMP1|MMP3|MSX2|NKD1|NPTX1|NR4A3|NREP|PAG1|PBK|PMAIP1|POSTN|RAB3B|RIMS4|RND1|RTKN2|SFRP4|TNF|TNFAIP3|TUBB2B|UCN2|WISP1
GO:0099177	regulation of trans-synaptic signaling	419	10	6.0771e-05	0.0166879	869|991|1000|1959|4884|5865|7124|8564|140730|347733	CBLN1|CDC20|CDH2|EGR2|KMO|NPTX1|RAB3B|RIMS4|TNF|TUBB2B
GO:0071396	cellular response to lipid	602	12	6.24173e-05	0.0167366	891|1869|2707|2920|2921|3569|3576|4488|7124|7128|8013|8564	CCNB1|CXCL2|CXCL3|E2F1|GJB3|IL6|IL8|KMO|MSX2|NR4A3|TNF|TNFAIP3
GO:0007346	regulation of mitotic cell cycle	602	12	6.24173e-05	0.0167366	891|991|995|1869|4085|7124|8318|9133|9232|54962|81620|144455	CCNB1|CCNB2|CDC20|CDC25C|CDC45|CDT1|E2F1|E2F7|MAD2L1|PTTG1|TIPIN|TNF
GO:0000076	DNA replication checkpoint	16	3	7.0588e-05	0.0183163	8318|54962|81620	CDC45|CDT1|TIPIN
GO:0051240	positive regulation of multicellular organismal process	1753	22	7.07193e-05	0.0183163	151|869|891|991|1272|1869|1907|1960|2201|2246|3549|3569|3576|4488|7124|7128|7516|8013|8507|10631|79805|347733	ADRA2B|CBLN1|CCNB1|CDC20|CNTN1|E2F1|EDN2|EGR3|ENC1|FBN2|FGF1|IHH|IL6|IL8|MSX2|NR4A3|POSTN|TNF|TNFAIP3|TUBB2B|VASH2|XRCC2
GO:0006950	response to stress	3908	37	7.49215e-05	0.0189704	151|366|891|995|1869|2246|2920|2921|3569|3576|4192|4314|4316|4488|5366|6364|7124|7128|7516|8013|8061|8318|8564|9156|9232|9315|10535|10631|10913|29089|29128|51659|54962|55872|79000|91319|144455	ADRA2B|AQP9|AUNIP|CCL20|CCNB1|CDC25C|CDC45|CXCL2|CXCL3|DERL3|E2F1|E2F7|EDAR|EXO1|FGF1|FOSL1|GINS2|IL6|IL8|KMO|MDK|MMP3|MMP7|MSX2|NR4A3|NREP|PBK|PMAIP1|POSTN|PTTG1|RNASEH2A|TIPIN|TNF|TNFAIP3|UBE2T|UHRF1|XRCC2
GO:0071222	cellular response to lipopolysaccharide	199	7	7.6624e-05	0.0189828	2920|2921|3569|3576|7124|7128|8564	CXCL2|CXCL3|IL6|IL8|KMO|TNF|TNFAIP3
GO:0071163	DNA replication preinitiation complex assembly	3	2	7.83972e-05	0.0190088	8318|81620	CDC45|CDT1
GO:0071930	negative regulation of transcription involved in G1/S transition of mitotic cell cycle	3	2	7.83972e-05	0.0190088	1869|144455	E2F1|E2F7
GO:0006935	chemotaxis	619	12	8.13474e-05	0.0195165	1907|1959|1960|2246|2920|2921|3569|3576|6364|8013|8061|347733	CCL20|CXCL2|CXCL3|EDN2|EGR2|EGR3|FGF1|FOSL1|IL6|IL8|NR4A3|TUBB2B
GO:0042330	taxis	621	12	8.38706e-05	0.0199123	1907|1959|1960|2246|2920|2921|3569|3576|6364|8013|8061|347733	CCL20|CXCL2|CXCL3|EDN2|EGR2|EGR3|FGF1|FOSL1|IL6|IL8|NR4A3|TUBB2B
GO:0010564	regulation of cell cycle process	726	13	9.01658e-05	0.0209457	891|991|995|1869|4085|4488|8318|9133|9232|25886|54962|81620|144455	CCNB1|CCNB2|CDC20|CDC25C|CDC45|CDT1|E2F1|E2F7|MAD2L1|MSX2|POC1A|PTTG1|TIPIN
GO:0051128	regulation of cellular component organization	2457	27	9.01807e-05	0.0209457	869|891|991|995|1000|1272|1869|4085|4312|4314|4488|5366|6424|7124|8061|8318|8507|8840|9133|9232|10631|11013|25886|27289|81620|221150|347733	CBLN1|CCNB1|CCNB2|CDC20|CDC25C|CDC45|CDH2|CDT1|CNTN1|E2F1|ENC1|FOSL1|MAD2L1|MMP1|MMP3|MSX2|PMAIP1|POC1A|POSTN|PTTG1|RND1|SFRP4|SKA3|TMSB15A|TNF|TUBB2B|WISP1
GO:0140014	mitotic nuclear division	277	8	9.31348e-05	0.0209457	891|991|995|4085|4605|9133|9232|81620	CCNB1|CCNB2|CDC20|CDC25C|CDT1|MAD2L1|MYBL2|PTTG1
GO:0062013	positive regulation of small molecule metabolic process	142	6	9.3334e-05	0.0209457	891|2246|5210|5366|7124|8013	CCNB1|FGF1|NR4A3|PFKFB4|PMAIP1|TNF
GO:0032879	regulation of localization	2746	29	9.34411e-05	0.0209457	151|1000|1272|1869|1907|2246|3569|3576|4314|5366|5865|6364|6424|7124|7128|8013|8564|10631|11013|27289|51308|57628|60598|81620|85407|91319|140730|284217|347733	ADRA2B|CCL20|CDH2|CDT1|CNTN1|DERL3|DPP10|E2F1|EDN2|FGF1|IL6|IL8|KCNK15|KMO|LAMA1|MMP3|NKD1|NR4A3|PMAIP1|POSTN|RAB3B|REEP2|RIMS4|RND1|SFRP4|TMSB15A|TNF|TNFAIP3|TUBB2B
GO:0009653	anatomical structure morphogenesis	2604	28	9.39743e-05	0.0209457	869|1000|1297|1368|1959|1960|2201|2246|3549|3569|3576|4488|4884|6424|7124|7128|7516|8013|10631|10913|24147|25886|27289|79805|85407|144455|284217|347733	CBLN1|CDH2|COL9A1|CPM|E2F7|EDAR|EGR2|EGR3|FBN2|FGF1|FJX1|IHH|IL6|IL8|LAMA1|MSX2|NKD1|NPTX1|NR4A3|POC1A|POSTN|RND1|SFRP4|TNF|TNFAIP3|TUBB2B|VASH2|XRCC2
GO:0071219	cellular response to molecule of bacterial origin	206	7	9.51315e-05	0.0209457	2920|2921|3569|3576|7124|7128|8564	CXCL2|CXCL3|IL6|IL8|KMO|TNF|TNFAIP3
GO:0050793	regulation of developmental process	2607	28	9.58897e-05	0.0209457	151|869|891|991|1000|1272|1869|1960|2201|2246|3549|3569|3576|4320|4488|6424|7124|7128|7516|8013|8507|9315|10631|27289|79805|85407|284217|347733	ADRA2B|CBLN1|CCNB1|CDC20|CDH2|CNTN1|E2F1|EGR3|ENC1|FBN2|FGF1|IHH|IL6|IL8|LAMA1|MMP11|MSX2|NKD1|NR4A3|NREP|POSTN|RND1|SFRP4|TNF|TNFAIP3|TUBB2B|VASH2|XRCC2
GO:0051304	chromosome separation	89	5	9.64943e-05	0.0209457	891|991|4085|9232|81620	CCNB1|CDC20|CDT1|MAD2L1|PTTG1
GO:0060252	positive regulation of glial cell proliferation	18	3	0.000102089	0.0219511	1869|3569|7124	E2F1|IL6|TNF
GO:0009790	embryo development	953	15	0.00010684	0.0225999	891|2201|2707|3549|3576|4488|7124|7516|8013|8061|9133|79805|85407|144455|284217	CCNB1|CCNB2|E2F7|FBN2|FOSL1|GJB3|IHH|IL8|LAMA1|MSX2|NKD1|NR4A3|TNF|VASH2|XRCC2
GO:0023052	signaling	6475	52	0.00010709	0.0225999	151|332|869|891|991|995|1000|1272|1869|1907|1959|1960|2201|2246|2920|2921|3549|3569|3576|3780|4192|4312|4314|4488|4884|5366|5865|6364|6424|7124|7128|8013|8564|8840|9315|9427|10631|10913|24147|27289|55635|55824|55872|60598|85407|90226|91319|140730|144455|219790|284217|347733	ADRA2B|BIRC5|CBLN1|CCL20|CCNB1|CDC20|CDC25C|CDH2|CNTN1|CXCL2|CXCL3|DEPDC1|DERL3|E2F1|E2F7|ECEL1|EDAR|EDN2|EGR2|EGR3|FBN2|FGF1|FJX1|IHH|IL6|IL8|KCNK15|KCNN1|KMO|LAMA1|MDK|MMP1|MMP3|MSX2|NKD1|NPTX1|NR4A3|NREP|PAG1|PBK|PMAIP1|POSTN|RAB3B|RIMS4|RND1|RTKN2|SFRP4|TNF|TNFAIP3|TUBB2B|UCN2|WISP1
GO:1901988	negative regulation of cell cycle phase transition	211	7	0.000110462	0.0230976	891|991|995|1869|4085|81620|144455	CCNB1|CDC20|CDC25C|CDT1|E2F1|E2F7|MAD2L1
GO:0048731	system development	4783	42	0.000111937	0.0231933	151|869|891|991|1000|1272|1297|1869|1907|1959|1960|2201|2246|2707|3549|3569|3576|4192|4488|4884|6424|7124|7128|7516|8013|8061|8507|9133|9156|9315|10631|10913|24147|25886|27289|50863|79805|85407|144455|219790|284217|347733	ADRA2B|CBLN1|CCNB1|CCNB2|CDC20|CDH2|CNTN1|COL9A1|E2F1|E2F7|EDAR|EDN2|EGR2|EGR3|ENC1|EXO1|FBN2|FGF1|FJX1|FOSL1|GJB3|IHH|IL6|IL8|LAMA1|MDK|MSX2|NKD1|NPTX1|NR4A3|NREP|NTM|POC1A|POSTN|RND1|RTKN2|SFRP4|TNF|TNFAIP3|TUBB2B|VASH2|XRCC2
GO:0006261	DNA-dependent DNA replication	148	6	0.00011722	0.0238729	8318|10535|51659|54962|81620|144455	CDC45|CDT1|E2F7|GINS2|RNASEH2A|TIPIN
GO:0030182	neuron differentiation	1317	18	0.0001253	0.025273	151|869|991|1000|1272|1959|3549|3569|4884|8013|8507|9315|10631|27289|50863|85407|284217|347733	ADRA2B|CBLN1|CDC20|CDH2|CNTN1|EGR2|ENC1|IHH|IL6|LAMA1|NKD1|NPTX1|NR4A3|NREP|NTM|POSTN|RND1|TUBB2B
GO:0048285	organelle fission	458	10	0.000126555	0.0253022	891|991|995|4085|4488|4605|9133|9232|81620|84057	CCNB1|CCNB2|CDC20|CDC25C|CDT1|MAD2L1|MND1|MSX2|MYBL2|PTTG1
GO:0008283	cell proliferation	2095	24	0.000130509	0.0258279	332|891|991|995|1000|1869|1907|1960|2246|3549|3569|3576|4488|6424|7124|7128|8013|8061|9133|29128|54962|79805|144455|219790	BIRC5|CCNB1|CCNB2|CDC20|CDC25C|CDH2|E2F1|E2F7|EDN2|EGR3|FGF1|FOSL1|IHH|IL6|IL8|MSX2|NR4A3|RTKN2|SFRP4|TIPIN|TNF|TNFAIP3|UHRF1|VASH2
GO:0045444	fat cell differentiation	217	7	0.000131451	0.0258279	1869|1959|3569|4320|4488|7124|8013	E2F1|EGR2|IL6|MMP11|MSX2|NR4A3|TNF
GO:0030071	regulation of mitotic metaphase/anaphase transition	51	4	0.000137277	0.0267421	891|991|4085|81620	CCNB1|CDC20|CDT1|MAD2L1
GO:1901700	response to oxygen-containing compound	1577	20	0.000139168	0.0268806	366|891|1869|1959|2707|2920|2921|3549|3569|3576|4314|4488|7124|7128|8013|8061|8564|8836|10631|81620	AQP9|CCNB1|CDT1|CXCL2|CXCL3|E2F1|EGR2|FOSL1|GGH|GJB3|IHH|IL6|IL8|KMO|MMP3|MSX2|NR4A3|POSTN|TNF|TNFAIP3
GO:0060326	cell chemotaxis	295	8	0.000143751	0.0275326	1907|1960|2246|2920|2921|3569|3576|6364	CCL20|CXCL2|CXCL3|EDN2|EGR3|FGF1|IL6|IL8
GO:0035295	tube development	1095	16	0.000146159	0.0277605	891|1000|1907|1960|2246|3549|3569|3576|4488|7124|7128|8013|10913|79805|144455|284217	CCNB1|CDH2|E2F7|EDAR|EDN2|EGR3|FGF1|IHH|IL6|IL8|LAMA1|MSX2|NR4A3|TNF|TNFAIP3|VASH2
GO:0009887	animal organ morphogenesis	982	15	0.000148585	0.0279881	1000|1297|2201|2246|3549|4488|6424|7124|7128|8013|10913|24147|25886|85407|284217	CDH2|COL9A1|EDAR|FBN2|FGF1|FJX1|IHH|LAMA1|MSX2|NKD1|NR4A3|POC1A|SFRP4|TNF|TNFAIP3
GO:0044773	mitotic DNA damage checkpoint	98	5	0.000152205	0.0282037	891|995|1869|54962|144455	CCNB1|CDC25C|E2F1|E2F7|TIPIN
GO:1902099	regulation of metaphase/anaphase transition of cell cycle	53	4	0.000159593	0.0293343	891|991|4085|81620	CCNB1|CDC20|CDT1|MAD2L1
GO:0007091	metaphase/anaphase transition of mitotic cell cycle	54	4	0.000171683	0.0313039	891|991|4085|81620	CCNB1|CDC20|CDT1|MAD2L1
GO:0030593	neutrophil chemotaxis	101	5	0.000175376	0.0313802	1907|2920|2921|3576|6364	CCL20|CXCL2|CXCL3|EDN2|IL8
GO:0010948	negative regulation of cell cycle process	304	8	0.000176517	0.0313802	891|991|995|1869|4085|9232|81620|144455	CCNB1|CDC20|CDC25C|CDT1|E2F1|E2F7|MAD2L1|PTTG1
GO:0034097	response to cytokine	1114	16	0.00017791	0.0313802	332|1907|2920|2921|3569|3576|4312|4314|4605|6364|7124|7128|8061|8564|10631|10913	BIRC5|CCL20|CXCL2|CXCL3|EDAR|EDN2|FOSL1|IL6|IL8|KMO|MMP1|MMP3|MYBL2|POSTN|TNF|TNFAIP3
GO:0006928	movement of cell or subcellular component	2138	24	0.00017829	0.0313802	1000|1907|1959|1960|2246|2920|2921|3569|3576|4192|4312|4314|4488|6364|7124|7128|8013|10631|11013|27289|50512|85407|284217|347733	CCL20|CDH2|CXCL2|CXCL3|EDN2|EGR2|EGR3|FGF1|IL6|IL8|LAMA1|MDK|MMP1|MMP3|MSX2|NKD1|NR4A3|PODXL2|POSTN|RND1|TMSB15A|TNF|TNFAIP3|TUBB2B
GO:0071216	cellular response to biotic stimulus	229	7	0.000183161	0.0318673	2920|2921|3569|3576|7124|7128|8564	CXCL2|CXCL3|IL6|IL8|KMO|TNF|TNFAIP3
GO:0051983	regulation of chromosome segregation	103	5	0.000192258	0.0331965	891|991|4085|9232|81620	CCNB1|CDC20|CDT1|MAD2L1|PTTG1
GO:0006977	DNA damage response, signal transduction by p53 class mediator resulting in cell cycle arrest	56	4	0.000197824	0.0336479	891|995|1869|144455	CCNB1|CDC25C|E2F1|E2F7
GO:0044784	metaphase/anaphase transition of cell cycle	56	4	0.000197824	0.0336479	891|991|4085|81620	CCNB1|CDC20|CDT1|MAD2L1
GO:0030330	DNA damage response, signal transduction by p53 class mediator	104	5	0.000201149	0.03396	891|995|1869|5366|144455	CCNB1|CDC25C|E2F1|E2F7|PMAIP1
GO:0001701	in utero embryonic development	311	8	0.000206055	0.0345324	891|2707|3549|7516|8061|9133|79805|144455	CCNB1|CCNB2|E2F7|FOSL1|GJB3|IHH|VASH2|XRCC2
GO:1902400	intracellular signal transduction involved in G1 DNA damage checkpoint	57	4	0.000211918	0.0350002	891|995|1869|144455	CCNB1|CDC25C|E2F1|E2F7
GO:0072431	signal transduction involved in mitotic G1 DNA damage checkpoint	57	4	0.000211918	0.0350002	891|995|1869|144455	CCNB1|CDC25C|E2F1|E2F7
GO:0098916	anterograde trans-synaptic signaling	690	12	0.00022378	0.0364314	869|991|1000|1959|1960|3780|4884|5865|7124|8564|140730|347733	CBLN1|CDC20|CDH2|EGR2|EGR3|KCNN1|KMO|NPTX1|RAB3B|RIMS4|TNF|TUBB2B
GO:0007268	chemical synaptic transmission	690	12	0.00022378	0.0364314	869|991|1000|1959|1960|3780|4884|5865|7124|8564|140730|347733	CBLN1|CDC20|CDH2|EGR2|EGR3|KCNN1|KMO|NPTX1|RAB3B|RIMS4|TNF|TUBB2B
GO:0044774	mitotic DNA integrity checkpoint	107	5	0.000229714	0.0371192	891|995|1869|54962|144455	CCNB1|CDC25C|E2F1|E2F7|TIPIN
GO:0035239	tube morphogenesis	909	14	0.000231262	0.0371192	1000|1960|2246|3549|3569|3576|4488|7124|7128|8013|10913|79805|144455|284217	CDH2|E2F7|EDAR|EGR3|FGF1|IHH|IL6|IL8|LAMA1|MSX2|NR4A3|TNF|TNFAIP3|VASH2
GO:1904019	epithelial cell apoptotic process	108	5	0.000239889	0.0378179	1869|3569|6424|7124|7128	E2F1|IL6|SFRP4|TNF|TNFAIP3
GO:0072413	signal transduction involved in mitotic cell cycle checkpoint	59	4	0.000242253	0.0378179	891|995|1869|144455	CCNB1|CDC25C|E2F1|E2F7
GO:1902402	signal transduction involved in mitotic DNA damage checkpoint	59	4	0.000242253	0.0378179	891|995|1869|144455	CCNB1|CDC25C|E2F1|E2F7
GO:1902403	signal transduction involved in mitotic DNA integrity checkpoint	59	4	0.000242253	0.0378179	891|995|1869|144455	CCNB1|CDC25C|E2F1|E2F7
GO:0071345	cellular response to cytokine stimulus	1028	15	0.000244028	0.0378359	332|1907|2920|2921|3569|3576|4312|4314|4605|6364|7124|7128|8564|10631|10913	BIRC5|CCL20|CXCL2|CXCL3|EDAR|EDN2|IL6|IL8|KMO|MMP1|MMP3|MYBL2|POSTN|TNF|TNFAIP3
GO:0099537	trans-synaptic signaling	698	12	0.000248649	0.038292	869|991|1000|1959|1960|3780|4884|5865|7124|8564|140730|347733	CBLN1|CDC20|CDH2|EGR2|EGR3|KCNN1|KMO|NPTX1|RAB3B|RIMS4|TNF|TUBB2B
GO:0000727	double-strand break repair via break-induced replication	5	2	0.000259569	0.0394407	8318|51659	CDC45|GINS2
GO:0099536	synaptic signaling	703	12	0.00026536	0.0400536	869|991|1000|1959|1960|3780|4884|5865|7124|8564|140730|347733	CBLN1|CDC20|CDH2|EGR2|EGR3|KCNN1|KMO|NPTX1|RAB3B|RIMS4|TNF|TUBB2B
GO:0032461	positive regulation of protein oligomerization	25	3	0.000280313	0.0416895	4312|4314|5366	MMP1|MMP3|PMAIP1
GO:0150077	regulation of neuroinflammatory response	25	3	0.000280313	0.0416895	3569|4314|7124	IL6|MMP3|TNF
GO:1990266	neutrophil migration	112	5	0.00028406	0.0416895	1907|2920|2921|3576|6364	CCL20|CXCL2|CXCL3|EDN2|IL8
GO:1903047	mitotic cell cycle process	816	13	0.000284249	0.0416895	891|991|995|1869|4085|4605|8318|9133|9232|25886|54962|81620|144455	CCNB1|CCNB2|CDC20|CDC25C|CDC45|CDT1|E2F1|E2F7|MAD2L1|MYBL2|POC1A|PTTG1|TIPIN
GO:0010646	regulation of cell communication	3532	33	0.000285344	0.0416895	151|869|991|1000|1869|1907|1959|2201|2246|2920|2921|3549|3569|3576|4192|4488|4884|5366|5865|6364|6424|7124|7128|8564|9315|10631|10913|55824|55872|85407|90226|140730|347733	ADRA2B|CBLN1|CCL20|CDC20|CDH2|CXCL2|CXCL3|E2F1|EDAR|EDN2|EGR2|FBN2|FGF1|IHH|IL6|IL8|KMO|MDK|MSX2|NKD1|NPTX1|NREP|PAG1|PBK|PMAIP1|POSTN|RAB3B|RIMS4|SFRP4|TNF|TNFAIP3|TUBB2B|UCN2
GO:0044786	cell cycle DNA replication	62	4	0.000293439	0.0425991	8318|54962|81620|144455	CDC45|CDT1|E2F7|TIPIN
GO:0051321	meiotic cell cycle	249	7	0.000305012	0.0437222	991|995|4488|7516|9156|9232|84057	CDC20|CDC25C|EXO1|MND1|MSX2|PTTG1|XRCC2
GO:0031571	mitotic G1 DNA damage checkpoint	63	4	0.000312102	0.0441828	891|995|1869|144455	CCNB1|CDC25C|E2F1|E2F7
GO:0044819	mitotic G1/S transition checkpoint	63	4	0.000312102	0.0441828	891|995|1869|144455	CCNB1|CDC25C|E2F1|E2F7
GO:0051239	regulation of multicellular organismal process	3093	30	0.00031597	0.0444543	151|869|891|991|1000|1272|1869|1907|1959|1960|2201|2246|3549|3569|3576|4488|4884|6424|7124|7128|7516|8013|8507|9315|10631|60598|79805|85407|284217|347733	ADRA2B|CBLN1|CCNB1|CDC20|CDH2|CNTN1|E2F1|EDN2|EGR2|EGR3|ENC1|FBN2|FGF1|IHH|IL6|IL8|KCNK15|LAMA1|MSX2|NKD1|NPTX1|NR4A3|NREP|POSTN|SFRP4|TNF|TNFAIP3|TUBB2B|VASH2|XRCC2
GO:0022414	reproductive process	1423	18	0.000325416	0.0455023	151|891|991|995|1869|2707|3549|4316|4488|5016|7516|8061|9156|9232|25886|79805|84057|144455	ADRA2B|CCNB1|CDC20|CDC25C|E2F1|E2F7|EXO1|FOSL1|GJB3|IHH|MMP7|MND1|MSX2|OVGP1|POC1A|PTTG1|VASH2|XRCC2
GO:0044783	G1 DNA damage checkpoint	64	4	0.000331601	0.0459518	891|995|1869|144455	CCNB1|CDC25C|E2F1|E2F7
GO:0000003	reproduction	1426	18	0.000333803	0.0459518	151|891|991|995|1869|2707|3549|4316|4488|5016|7516|8061|9156|9232|25886|79805|84057|144455	ADRA2B|CCNB1|CDC20|CDC25C|E2F1|E2F7|EXO1|FOSL1|GJB3|IHH|MMP7|MND1|MSX2|OVGP1|POC1A|PTTG1|VASH2|XRCC2
GO:0051962	positive regulation of nervous system development	517	10	0.000334679	0.0459518	151|869|991|1272|1869|3569|7124|7516|8507|347733	ADRA2B|CBLN1|CDC20|CNTN1|E2F1|ENC1|IL6|TNF|TUBB2B|XRCC2
GO:0023051	regulation of signaling	3567	33	0.000343592	0.0468931	151|869|991|1000|1869|1907|1959|2201|2246|2920|2921|3549|3569|3576|4192|4488|4884|5366|5865|6364|6424|7124|7128|8564|9315|10631|10913|55824|55872|85407|90226|140730|347733	ADRA2B|CBLN1|CCL20|CDC20|CDH2|CXCL2|CXCL3|E2F1|EDAR|EDN2|EGR2|FBN2|FGF1|IHH|IL6|IL8|KMO|MDK|MSX2|NKD1|NPTX1|NREP|PAG1|PBK|PMAIP1|POSTN|RAB3B|RIMS4|SFRP4|TNF|TNFAIP3|TUBB2B|UCN2
GO:0019221	cytokine-mediated signaling pathway	728	12	0.000364028	0.0493864	332|1907|2920|2921|3569|3576|4312|4314|6364|7124|7128|10913	BIRC5|CCL20|CXCL2|CXCL3|EDAR|EDN2|IL6|IL8|MMP1|MMP3|TNF|TNFAIP3
