# Supplementary material for: Disrupted PGR-B and ESR1 signaling underlies defective decidualization linked to severe preeclampsia
Source: eLife. 2021 Oct 28;10:e70753. doi: 10.7554/eLife.70753 (PMC8553341; doi:10.7554/eLife.70753)
Supplement: Figure 4—source data 1. [file elife-70753-fig4-data1.xlsx]

## Sheet: FC1.4
Figure 4 - Source data 1. List of genes selected as defective decidualization signature in sPE (120 DEGs with FDR < 0.05 and FC ≥ 1.4).
Gene Symbol	EntrezID	PValue	FDR	logFC	FC*
MMP3	4314	9.49043e-05	0.025984	-6.11672	-69.393
IL8	3576	2.94493e-06	0.00770414	-5.26729	-38.5135
CCL20	6364	2.20857e-05	0.0155262	-4.76287	-27.1498
AQP9	366	0.000288381	0.0441574	-4.59969	-24.2462
MMP1	4312	1.76064e-05	0.0155262	-4.58624	-24.0212
FGF1	2246	2.0974e-05	0.0155262	-4.20286	-18.4157
MMP11	4320	1.02583e-07	0.00188179	-4.14443	-17.6848
RND1	27289	2.45454e-05	0.0155262	-4.14429	-17.683
MMP7	4316	6.94488e-05	0.023592	-4.07881	-16.8984
RIMS4	140730	6.63513e-06	0.00987294	-3.97706	-15.7477
IGFN1	91156	3.77382e-05	0.01871	-3.92705	-15.211
NR4A3	8013	2.31088e-05	0.0155262	-3.90315	-14.9612
MTUS2	23281	4.05536e-05	0.0188821	-3.77761	-13.7143
TMEM215	401498	0.0001181	0.029276	-3.71663	-13.1467
EGR3	1960	9.08071e-06	0.0111051	-3.67623	-12.7836
ECEL1	9427	4.44731e-07	0.00393517	-3.6008	-12.1324
CXCL3	2921	1.99658e-05	0.0155262	-3.57245	-11.8964
EDN2	1907	0.000320783	0.0459722	-3.54594	-11.6798
CBLN1	869	3.55349e-06	0.00770414	-3.477	-11.1348
FBN3	84467	0.000252537	0.0417346	-3.38299	-10.4323
CXCL2	2920	0.000271687	0.0433375	-3.37172	-10.3512
COL9A1	1297	1.96993e-05	0.0155262	-3.36244	-10.2848
POSTN	10631	4.22027e-05	0.0188821	-3.23115	-9.39016
SFRP4	6424	0.000346962	0.0470354	-3.21458	-9.28296
EGR2	1959	1.21786e-05	0.0131414	-3.14736	-8.86033
ARSI	340075	3.02862e-05	0.0165377	-3.14692	-8.85762
IHH	3549	6.5605e-05	0.0233833	-3.04442	-8.25015
NPTX1	4884	0.000355881	0.0470354	-3.02838	-8.15895
UCN2	90226	7.47065e-06	0.00987294	-2.95944	-7.7782
OVGP1	5016	4.06119e-05	0.0188821	-2.91684	-7.55189
FOSL1	8061	1.39877e-05	0.0137315	-2.91377	-7.53587
IL6	3569	8.51843e-05	0.0252036	-2.77323	-6.83638
TNF	7124	0.000242121	0.0415091	-2.74055	-6.68324
WISP1	8840	0.000198542	0.03808	-2.71181	-6.55141
DPP10	57628	2.16657e-05	0.0155262	-2.6972	-6.48544
PMAIP1	5366	1.80056e-06	0.00660591	-2.68553	-6.43318
RAB3B	5865	3.06496e-06	0.00770414	-2.68523	-6.43182
ADRA2B	151	0.000199285	0.03808	-2.65873	-6.31478
KMO	8564	0.000356407	0.0470354	-2.64654	-6.26165
NKD1	85407	6.43563e-07	0.00393517	-2.62681	-6.17657
CNTN1	1272	0.000239675	0.0414774	-2.47234	-5.54944
KCNK15	60598	2.87062e-05	0.0165289	-2.45923	-5.49923
GJB3	2707	4.85246e-05	0.0193508	-2.45018	-5.46485
FJX1	24147	1.71547e-06	0.00660591	-2.41625	-5.33782
EDAR	10913	0.000389022	0.049924	-2.4031	-5.28938
TMSB15A	11013	7.53495e-06	0.00987294	-2.40132	-5.28286
LAMP5	24141	9.41724e-05	0.025984	-2.38653	-5.22897
NTM	50863	0.000175405	0.0363948	-2.33145	-5.03311
KLK2	3817	0.000218911	0.0404978	-2.29389	-4.90378
TNFAIP3	7128	0.000227461	0.0405101	-2.26853	-4.81832
CPM	1368	0.000244485	0.0415263	-2.24812	-4.75063
PBK	55872	8.89234e-05	0.0257709	-2.22822	-4.68555
COL22A1	169044	2.72818e-05	0.0165289	-2.20401	-4.60759
PFKFB4	5210	0.000133712	0.0306601	-2.17558	-4.51766
MSX2	4488	6.55685e-06	0.00987294	-2.17239	-4.50769
MYBL2	4605	0.000110257	0.0280911	-2.0938	-4.2687
PRRG3	79057	0.000291105	0.0441574	-2.09145	-4.26177
EXO1	9156	0.00014494	0.0312797	-2.08772	-4.25075
C2CD4C	126567	9.84433e-05	0.0265565	-2.08218	-4.23447
TUBB2B	347733	0.000346119	0.0470354	-2.0715	-4.20322
E2F7	144455	0.000310778	0.0452454	-2.03645	-4.10235
FAM222A	84915	4.19494e-05	0.0188821	-2.0359	-4.10078
CDC25C	995	0.000317132	0.0458069	-2.02479	-4.06933
VASH2	79805	6.48899e-05	0.0233833	-2.01875	-4.05233
RTKN2	219790	7.74409e-05	0.0244927	-2.00623	-4.01732
KCNN1	3780	0.000225184	0.0404978	-1.99153	-3.9766
DEPDC1	55635	0.000360157	0.0471908	-1.98703	-3.96421
LAMA1	284217	0.000108317	0.0280911	-1.94225	-3.84306
MND1	84057	1.01168e-05	0.0115989	-1.93642	-3.82754
SKA3	221150	0.000340667	0.0470354	-1.92647	-3.80124
ADAMTS14	140766	0.000109474	0.0280911	-1.90952	-3.75685
CDC45	8318	0.000251386	0.0417346	-1.86917	-3.65322
FBN2	2201	0.00023381	0.0408478	-1.86482	-3.64223
CDC20	991	0.000335246	0.0470354	-1.8632	-3.63814
CDT1	81620	3.21621e-05	0.0168566	-1.84141	-3.58359
UHRF1	29128	4.54212e-05	0.0193508	-1.84138	-3.58353
BIRC5	332	0.00034593	0.0470354	-1.82106	-3.5334
ANO7	50636	0.00022263	0.0404978	-1.81402	-3.51622
NREP	9315	0.000231216	0.0407829	-1.80598	-3.49666
ZNF367	195828	0.000141751	0.0312797	-1.79719	-3.47543
ENC1	8507	6.62848e-05	0.0233833	-1.78378	-3.44328
GINS2	51659	7.45766e-05	0.0240006	-1.76623	-3.40163
TK1	7083	3.06521e-05	0.0165377	-1.76297	-3.39397
CCNB2	9133	0.000354196	0.0470354	-1.75212	-3.36853
PTTG1	9232	0.000132644	0.0306601	-1.71857	-3.2911
DERL3	91319	4.39346e-05	0.019189	-1.7165	-3.28639
XRCC2	7516	0.000348988	0.0470354	-1.6481	-3.13421
PAG1	55824	0.000123285	0.0294217	-1.64614	-3.12994
REEP2	51308	0.000390239	0.049924	-1.63232	-3.10012
PODXL2	50512	5.40379e-05	0.0206515	-1.62301	-3.08016
E2F1	1869	0.000293676	0.0441574	-1.62197	-3.07795
CDH2	1000	7.11115e-05	0.0237176	-1.62108	-3.07605
CCNB1	891	0.000308503	0.0452454	-1.51875	-2.86543
UBE2T	29089	0.000121428	0.0294217	-1.51334	-2.8547
MAD2L1	4085	0.000310262	0.0452454	-1.49381	-2.81632
ITIH5	80760	0.000190369	0.0375499	-1.48242	-2.79416
CDH24	64403	5.04321e-05	0.0196835	-1.45775	-2.74679
NAT8L	339983	0.000390149	0.049924	-1.42233	-2.68019
AUNIP	79000	0.000189954	0.0375499	-1.39176	-2.62398
CENPH	64946	9.32773e-05	0.025984	-1.35591	-2.55958
GGH	8836	0.000249052	0.0417346	-1.32745	-2.50958
MDK	4192	0.000108259	0.0280911	-1.32046	-2.49746
POC1A	25886	0.000182385	0.0367656	-1.27833	-2.42558
FOLH1	2346	0.000263435	0.042765	-1.25281	-2.38305
RNASEH2A	10535	0.000127691	0.0300304	-1.12378	-2.17917
TIPIN	54962	0.000179616	0.0366096	-1.01441	-2.02008
AASS	10157	0.000161857	0.0345245	1.14022	2.20415
LPIN3	64900	0.000270354	0.0433375	1.3936	2.62734
RIMBP2	23504	0.000288534	0.0441574	1.72145	3.29769
PRKXP1	441733	7.34087e-05	0.0240006	1.81295	3.51361
RIMS2	9699	0.000213307	0.0400458	1.99918	3.99773
LIPI	149998	0.000143291	0.0312797	1.9992	3.99779
ORAOV1P1	100873907	0.000346511	0.0470354	2.00021	4.00058
GRAMD1C	54762	0.000292523	0.0441574	2.05163	4.14575
LINGO4	339398	0.000123499	0.0294217	2.05487	4.15505
FILIP1	27145	0.000164056	0.0345912	2.09584	4.27474
CTD-2008P7.9	101926984	0.000176577	0.0363948	2.36138	5.13862
SLCO4C1	353189	6.86302e-05	0.023592	3.21208	9.26687
RNU6-831P	106481443	8.29534e-05	0.0249943	4.73447	26.6206
MTND1P23	100887749	0.000301724	0.0449986	6.50407	90.7654
*FC: indicates downregulated genes calculated as -POWER(2,-logFC)
