# Supplementary material for: Disrupted PGR-B and ESR1 signaling underlies defective decidualization linked to severe preeclampsia
Source: eLife. 2021 Oct 28;10:e70753. doi: 10.7554/eLife.70753 (PMC8553341; doi:10.7554/eLife.70753)
Supplement: Supplementary file 2. [file elife-70753-supp2.xlsx]

## Sheet: Hoja1
Supplementary file 2. Biological and technical variables of interest for controlling confounding effects in the RNA-seq analysis.
Donor	Group	(i) Age of the donor	(ii) Time since last pregnancy	(iii) Day of cycle for biopsy (before cycle ends)	(iv) Date processing/batch	(v) RIN of RNA sample	(vi) Sequencing depth (raw reads per library)	vii. Percent mapped reads to genome (hg19)	viii. Ethnicity of donor
C1	Control	39	1.5	4	1	8.4	16025682	94.8918	Caucasian
C10	Control	30	4	2	2	8.7	15334997	96.95	Caucasian
C11	Control	41	2.3	2	1	8.9	20486156	94.5104	Caucasian
C2	Control	37	4.4	1	2	6.3	11096416	94.3635	Caucasian
C3	Control	40	4.8	4	2	7	8164469	92.2194	Caucasian
C4	Control	34	8.9	2	2	8.4	11031261	93.7856	Caucasian
C5	Control	41	1.5	4	1	5.2	8312541	92.6095	Caucasian
C6	Control	38	8.7	6	1	5.3	14394669	93.6673	Latin
C7	Control	28	1.4	3	2	7.9	25243090	97.2078	African
C8	Control	43	2.9	4	2	7.4	12967178	94.5221	Caucasian
C9	Control	36	1.8	5	2	8.6	21756039	96.2567	Latin
C18	Control	38	1.42	1	3	8	8397993	97.079	Caucasian
C20	Control	41	8.79	5	3	9.3	5122956	96.1774	Caucasian
C21	Control	36	5.33	6	3	9.1	8748652	97.6125	Caucasian
C22	Control	33	4.2	4	3	9.4	8415149	96.3635	Caucasian
C25	Control	25	1.5	2	3	8.1	6989298	95.8337	Latin
sPE1	sPE	37	2.6	5	3	8.4	10612006	97.2206	Caucasian
sPE2	sPE	30	2.7	1	3	9.1	16534887	94.0355	Caucasian
sPE3	sPE	36	4	3	3	9.3	11852535	96.2954	Caucasian
sPE4	sPE	38	4.5	4	3	9.2	9192303	92.6983	Caucasian
sPE5	sPE	41	2.6	6	3	8.7	7652629	95.2171	Caucasian
sPE6	sPE	40	7.5	1	3	8.3	6719499	96.6662	Caucasian
sPE7	sPE	40	3.8	1	3	9.2	14618494	97.3674	Latin
sPE8	sPE	39	2.9	1	3	9.6	11476573	96.5898	Caucasian
sPE9	sPE	40	4	2	3	9.4	17113411	97.5191	Latin
sPE10	sPE	30	3.2	5	2	8.4	27246424	95.1588	Caucasian
sPE11	sPE	40	5.8	3	1	7.6	16305782	95.6588	Caucasian
sPE12	sPE	42	1.6	1	2	8.5	11722265	97.0579	Caucasian
sPE13	sPE	41	5.1	4	1	4.9	20164331	96.0064	Caucasian
sPE14	sPE	29	3.3	4	2	7.4	22636735	96.9984	Caucasian
sPE15	sPE	39	2.9	3	1	8	31426841	93.8708	Latin
sPE16	sPE	34	3.5	5	1	7	12101006	93.2108	Latin
sPE17	sPE	30	3	4	1	8	21158390	93.7777	Caucasian
sPE18	sPE	37	3.25	6	1	8.7	27905439	96.2615	Caucasian
sPE19	sPE	36	1.92	1	2	6.9	10813702	94.982	Caucasian
sPE20	sPE	34	1.88	3	2	8.1	22361473	93.8631	Caucasian
sPE21	sPE	40	2	3	2	8.4	21147093	96.3136	Caucasian
sPE22	sPE	43	1.29	1	1	8.7	30957526	95.7172	Caucasian
sPE23	sPE	37	4.42	2	1	7.5	23875845	94.7884	Caucasian
sPE24	sPE	41	2.8	2	2	7.5	22885895	96.8552	Caucasian
